# Supplementary material for: Discovery of new STAT3 inhibitors as anticancer agents using ligand-receptor contact fingerprints and docking-augmented machine learning
Source: Royal Society of Chemistry journal article supplement (doi:10.1039/d2ra07007c), 2023-01-01
Supplement: d2ra07007c1.pdf [file d2ra07007c1.pdf]

## Supporting Information

### Discovery of New STAT3 Inhibitors as Anticancer Agents Using Docking-Based Ligand- Receptor Contacts Fingerprints and Bioactivity - Classifying Machine Learning

**Nour Jamal Jaradat<sup>1</sup>, Walhan Alshaer<sup>2</sup>, Mamon Hatmal<sup>3</sup>, Mutasem Omar Taha<sup>1\*</sup>**

<sup>1</sup>Department of Pharmaceutical Sciences, Faculty of Pharmacy, University of Jordan, Amman 11492, Jordan.

<sup>2</sup>Cell Therapy Center, the University of Jordan, Amman 11942, Jordan.

<sup>3</sup>Department of Medical Laboratory Sciences, Faculty of Applied Medical Sciences, The Hashemite University, P.O. Box 330127, Zarqa 13133, Jordan

\*Corresponding Author.,

Telephone: 00962 6 5355000 ext. 23305.

Fax: 00962 6 5339649.

Email: mutasem@ju.edu.jo

#### **Table of Contents**

|                    |                  |
|--------------------|------------------|
| <b>Pages 2-8</b>   | <b>SM1-SM3</b>   |
| <b>Pages 9- 28</b> | <b>Table S1</b>  |
| <b>Page 28</b>     | <b>Table S2</b>  |
| <b>Page 29</b>     | <b>Table S3</b>  |
| <b>Page 30</b>     | <b>Table S4</b>  |
| <b>Page 30</b>     | <b>Table S5</b>  |
| <b>Page 31</b>     | <b>Figure S1</b> |
| <b>Page 32</b>     | <b>Figure S2</b> |
| <b>Pages 33-37</b> | <b>Figure S3</b> |

## SM1. Docking

### LibDock

The site-feature docking algorithm (LibDock) docks ligands, after the removal of their hydrogen atoms, into the active site guided by the binding hotspots. The ligands' conformations are aligned to polar and nonpolar receptor interaction sites, i.e., hotspots<sup>31, 32</sup>. The following LibDock parameters were implemented in the current study: CAT-CONFIRM module of Discovery Studio 4.5 was utilized to produce a maximum of 255 conformers (not exceeding an energy threshold of 20 kcal/mol from the most stable conformer) for each ligand employing "CAESAR" conformation generation option. A binding site sphere of 12.5 Å radius surrounding the centre of the copied co-crystallized ligand (PDB code: KQV) from the STAT3 crystallographic structure (PDB code: 6NJS) was utilized to locate the binding site. The number of binding site hotspots (polar and apolar) was set to 100. The ligand-to-hotspots matching RMSD tolerance value was set to 0.25 Å. The maximum number of poses saved for each ligand during hotspots matching before final pose minimization = 100. Maximum number of poses to be saved for each ligand in the binding pocket = 100. Minimum LibDock score (poses below this score are not reported) = 100. Maximum number of rigid body minimization steps during the final pose optimization (using BFGS method) = 50. Maximum number of steric clashes allowed before the pose-hotspot alignment is terminated (specified as a fraction of the heavy atom count) = 0.1. Maximum value for nonpolar solvent accessible surface area for a particular pose to be reported as successful = 15.0 Å<sup>2</sup>. Maximum value for polar solvent accessible solvent area for a particular pose to be reported as successful = 5.0 Å<sup>2</sup>. Docked poses/conformers were finally energy-minimized using the SMART minimizer option in LibDock. This option performs two minimization steps: Initial 1000 steps of Steepest Descent with an RMS gradient tolerance of three (kcal/mol/Å), followed by a maximum of 1000 steps of

Conjugate Gradient minimization with an RMS gradient tolerance of 0.001 (kcal/mol/Å) and minimization energy change of 0.0 kcal.

### **CDOCKER**

CDOCKER is a CHARMM-based simulated annealing/molecular dynamics methodology that applies rigid receptor for docking<sup>34</sup>. The following CDOCKER parameters were implemented in the current project. A binding site sphere of 12.5 Å radius surrounding the centre of the co-crystallized ligand (PDB code: 6NJS; PDB code of ligand: KQV) was implemented. Starting ligands' conformers were energy-minimized then heated to 1000 K over 1000 molecular dynamics steps to generate 10 starting random conformations for each ligand. Each random conformer was rotated 10 times within the binding pocket for consequent energy refinement. The Van der Waals energies of the resulting conformers/poses were evaluated and those of  $\geq 300$  kcal/mol were discarded. Surviving conformers/poses were exposed to a cycle of simulated annealing over 2000 heating steps to targeted temperature of 700 K followed by 5000 cooling steps to targeted temperature of 300 K. The docked poses were energy minimized to a final minimization gradient tolerance zero Kcal/mol/Å. Top 100 poses were saved for subsequent scoring.

### **LigandFit**

LigandFit employs Monte-Carlo techniques to create ligand conformations and docks them into the active site utilizing shape-based initial docking<sup>33</sup>. The following LigandFit settings were implemented in the current research. A binding site composed of 8434 grid points (grid spacing of 0.5Å in the X., Y and Z dimensions) surrounding the co-crystallized ligand within STAT3 (PDB code: 6NJS., PDB code of ligand: KQV) was used. Monte Carlo search parameters are as follows:

Number of trials = 30000 and search step for torsions with polar hydrogens = 30.0. The RMS threshold for ligand-to-binding site shape match was set to 2.5 Å., assuming a maximum of three binding site partitions. Interaction energy parameters: The interaction energies were assessed using CFF force field (version 1.02) with a non-bonded cutoff distance of 10.0 Å and distance dependent dielectric. An energy grid extending 3.0 Å from the binding site was implemented. The interaction energy was estimated by a trilinear interpolation value using soft potential energy approximations. Rigid body ligand minimization parameters: 40 steepest descend followed by 80 BFGS minimization iterations were applied to every orientation of the docked ligand. The maximum number of retained poses is 100. Each docked pose/conformer was energy-minimized using the SMART minimizer option in LigandFit., which executes two minimization steps: Initial 1000 steps of Steepest Descent with an RMS gradient tolerance of 3 (kcal/mol/Å), followed by a maximum of 1000 steps of Conjugate Gradient minimization with an RMS gradient tolerance of 0.001 (kcal/mol/Å) and minimization energy change of 0.0 kcal.

## **SM2. Machine Learning**

### **Random Forests (RF)**

RF is a multipurpose ML strategy for classification based on ensemble of Decision Trees (DTs). Each tree predicts a classification independently and “votes” for the related class. Most of the votes decide the overall RF predictions<sup>21</sup>. We implemented RF Learner node within KNIME Analytics Platform (Version 4.3.3) with the following settings: Splitting criterion is Information Gain Ratio (which normalizes the standard information gain by the split entropy to overcome any unfair preference for nominal splits with many child nodes), Number of trees = 100. No limitations were imposed on the number of levels or minimum node size.

### **eXtreme Gradient Boosting (XGBoost)**

eXtreme Gradient Boosting (XGBoost., or XGB) relies on the ensemble of weak decision tree (DT) type models to create boosted., DT-type models. This system includes a novel tree learning algorithm., a theoretically justified weighted quantile sketch process with parallel and distributed computing<sup>22</sup>. We implemented the XGBoost Learner node within KNIME Analytics Platform (Version 4.3.3) with the following settings: Tree booster was implemented with depthwise grow policy., boosting rounds = 100., Eta = 0.3., Gamma = 0., maximum depth = 6., minimum child weight = 1., maximum delta step = 0., subsampling rate = 1., column sampling rate by tree = 1., column sampling rate by level = 1., lambda = 1., Alpha = 0., sketch epsilon = 0.03., scaled positive weight = 1. Maximum number of bins = 256., Sample type (uniform)., Normalize type (tree)., and Dropout rate = 0.

### **Naïve Bayes**

Naïve Bayes (NB) is a simple classifier whereby class labels are predicted and assigned to external observations based on vectors of descriptors for some limited set of training observations. NB classifier presumes each descriptor to contribute independently to the probability that certain observation (i.e., docked pose) belongs to a particular class (i.e., active, intermediate, or inactive)<sup>23</sup>. The probability of certain observation to belong to certain class is the multiplication of the individual probabilities of that class within each individual descriptor<sup>24</sup>.

### **Probabilistic Neural Network PNN**

It is a feed forward neural network used for classification and pattern recognition. PNN is formed by replacing the sigmoid activation function with an exponential function that can compute nonlinear decision boundaries approaching the Bayes optimal. A PNN classifier, having four layers of neural network, can be used to map any input pattern to any number of classification<sup>25</sup>.<sup>26</sup>. PNN models were built using the PNN learner node default settings within KNIME Analytics Platform (Version 4.3.3).

### **k-Nearest Neighbors (kNN)**

The kNN classifier depends on a distance learning methodology that calculates the activity value of an unknown member based on the bioactivities of a certain number (k) of nearest neighbors (kNNs) in the training set. In this classifier., the similarity is measured by a distance metric<sup>17</sup>. We implemented kNN Learner node within KNIME Analytics Platform (Version 4.3.3). The value of k was scanned from 3 to 5. The runs were repeated to include all possible combinations (i.e., of k) resulting from allowing the influence of neighbors to be either distance-dependent or distance-independent.

### **Multilayer perceptron (MLP)**

MLP which is a modification of the standard linear perceptron, has a neural network architecture consisting of a layer with several nodes., where each node connects to a subsequent node in another layer. The concept of NN is that each input into the neuron has its own weight., that is adjusted to train the network. In between the inputs and the output layer., there may be several hidden layers<sup>27</sup>. We implemented the MLP learner node in its default settings within the KNIME Analytics Platform (Version 4.3.3).

## **SM3. Biological evaluation of the captured hits**

### **Cell viability assay (MTT) and IC<sub>50</sub> determination**

Rapid colorimetric test based on mitochondrial dehydrogenase enzymes' capacity to transform 3,-4,5 dimethylthiazol -2,5 diphenyl tetrazolium bromide (MTT) into a purple formazan precipitate. A multi-well plate reader is used to measure the optical density after the formazan crystals have been dissolved. Due to its simplicity and suitability for automation, MTT has thus emerged as the preferred technique for first drug screening in cell lines to assess cell viability<sup>54</sup>.

To determine the IC<sub>50</sub> of NCI hits for cells under study., first; an MTT assay was performed. Approximately  $8 \times 10^3$  cells per well were seeded into a 96 well plate (Corning., USA) and treated with different concentrations of NCI ligands., Both treated and control cells were incubated at 37 °C in a 5% CO<sub>2</sub> incubator for 72 h after which the old media was aspirated and the MTT assay salt (Bioworld., USA) in 100 µl of fresh media was added to each well. Following that., plates were incubated at 37 °C for 3 h., and then 50 µl of solubilization solution (DMSO) was added to each well. The absorbance of the solution was measured at 570 nm using Glomax plate reader (Promega., USA) to determine cells' viability.

### **Quantitative Polymerase Chain Reaction (qPCR) analysis**

qPCR analysis was performed to determine the expression intensities of target genes (c-Myc and Bcl-xl) at mRNA levels. Cells were lysed by Trizol-hybrid method for RNA extraction using miniRNeasy kit (Qiagen, USA). The extracted RNA was quantified by Nanodrop (Thermofisher, USA). To synthesize cDNA, 0.5 µg total RNA was reverse transcribed using PrimeScript RT Master Mix (Cat No. RR036A, Takara, China) using T100™ Thermal cycler PCR instrument (BioRad, USA). Primers were designed using Primer-BLAST (RRID:SCR\_003095) and obtained from IDT (USA) (Table S2).

The qPCR reaction mix was prepared by mixing 25 ng of cDNA with 200 nM of gene-specific forward and reverse primers (IDT), 7.2 µL of nuclease-free water, and 10 µL of SYBR Premix Ex Taq II (Tli RNaseH Plus) (Cat No. RR820L, Takara, China). The amplification was performed on CFX96 C1000 Touch thermal cycler (BioRad, USA) with the following temperature setting: (i) 95 ° C for 3 minutes, (ii) 40 cycles 95 ° C for 5 seconds and 61 ° C for 30 seconds. 18srRNA and actin-β were used as housekeeping reference genes. Each sample was examined in triplicate, and

a mean value was calculated. Data were analyzed according to  $\Delta\Delta C_t$  method using CFX Maestro™ Software - Bio-Rad.



| <b>Table S1.</b> Chemical structures of modeled compounds in SMILE formats and their reported bioactivities |                  |                                                                                                                                                             |                                 |
|-------------------------------------------------------------------------------------------------------------|------------------|-------------------------------------------------------------------------------------------------------------------------------------------------------------|---------------------------------|
| <b>Compound</b>                                                                                             | <b>ChEMBL ID</b> | <b>SMILES</b>                                                                                                                                               | <b>IC<sub>50</sub><br/>(nM)</b> |
| <b>1</b>                                                                                                    | CHEMBL156448     | <chem>CC(=O)N[C@@H](Cc1ccc(OP(=O)(O)O)cc1)C(=O)N[C@H](C(=O)N[C@@H](CC(C)C)C(=O)N[C@@H](CCC(N)=O)C(=O)NCC(=O)N[C@@H](CC(=O)O)C(N)=O)C(C)C</chem>             | 8000                            |
| <b>2</b>                                                                                                    | CHEMBL405322     | <chem>CC(=O)N[C@@H](Cc1ccc(C(=O)O)cc1)C(=O)N[C@@H](CC(C)C)C(=O)N1CCC[C@@H]1C(=O)N[C@@H](CCC(N)=O)C(=O)N[C@H](C(=O)N[C@H](C(N)=O)C(C)C)[C@@H](C)O</chem>     | 6000                            |
| <b>3</b>                                                                                                    | CHEMBL160849     | <chem>CC(=O)N[C@@H](Cc1ccc(CP(=O)(O)O)cc1)C(=O)N[C@@H](CC(C)C)C(=O)N1CCC[C@@H]1C(=O)N[C@@H](CCC(N)=O)C(=O)N[C@H](C(=O)N[C@H](C(N)=O)C(C)C)[C@@H](C)O</chem> | 8000                            |
| <b>4</b>                                                                                                    | CHEMBL346370     | <chem>CC(=O)N[C@@H](Cc1ccc(OP(=O)(O)O)cc1)C(=O)N[C@@H](C)C(=O)N1CCC[C@@H]1C(=O)N[C@@H](CCC(N)=O)C(=O)N[C@H](C(=O)N[C@H](C(N)=O)C(C)C)[C@@H](C)O</chem>      | 1600                            |
| <b>5</b>                                                                                                    | CHEMBL160730     | <chem>CC(=O)N[C@@H](Cc1ccc(OP(=O)(O)O)cc1)C(=O)N[C@@H](CCC(N)=O)C(=O)N1CCC[C@@H]1C(=O)N[C@@H](CCC(N)=O)C(=O)N[C@@H](C)C(=O)N[C@@H](CCCCN)C(N)=O</chem>      | 6000                            |
| <b>6<sup>a</sup></b>                                                                                        | CHEMBL156168     | <chem>CC[C@H](C)[C@H](NC(=O)[C@H](Cc1ccc(OP(=O)(O)O)cc1)NC(C)=O)C(=O)N[C@@H](CC(N)=O)C(=O)N[C@@H](CCC(N)=O)C(=O)N[C@@H](CO)C(=O)N[C@H](C(N)=O)C(C)C</chem>  | 30000                           |
| <b>7</b>                                                                                                    | CHEMBL157314     | <chem>CC(=O)N[C@H](Cc1ccc(OP(=O)(O)O)cc1)C(=O)N[C@H](CC(C)C)C(=O)N1CCC[C@H]1C(=O)N[C@@H](CCC(=O)O)C(=O)N[C@H](C(=O)N[C@H](C(N)=O)C(C)C)[C@@H](C)O</chem>    | 6000                            |
| <b>8</b>                                                                                                    | CHEMBL346706     | <chem>CC(=O)N[C@@H](Cc1ccc(OP(=O)(O)O)cc1)C(=O)N[C@@H](CO)C(=O)N[C@@H](CC(=O)O)C(=O)NCC(=O)N[C@@H](CC(N)=O)C(=O)N[C@@H](Cc1cccc1)C(N)=O</chem>              | 150000                          |
| <b>9</b>                                                                                                    | CHEMBL156407     | <chem>CC(=O)N[C@H](Cc1ccc(OP(=O)(O)O)cc1)C(=O)N[C@H](CC(C)C)C(=O)N1CCC[C@H]1C(=O)N[C@@H](CCC(N)=O)C(=O)N[C@@H](C)C(=O)N[C@H](C(N)=O)C(C)C</chem>            | 800                             |
| <b>10<sup>a</sup></b>                                                                                       | CHEMBL160658     | <chem>CC(=O)N[C@@H](Cc1ccc(OP(=O)(O)O)cc1)C(=O)N[C@@H](CC(C)C)C(=O)N1CCC[C@H]1C(=O)N[C@H](CCC(N)=O)C(N)=O</chem>                                            | 1000                            |
| <b>11</b>                                                                                                   | CHEMBL156046     | <chem>CC(=O)N[C@@H](Cc1ccc(OP(=O)(O)O)cc1)C(=O)N[C@@H](CC(C)C)C(=O)NC(C)C(=O)N[C@@H](CCC(N)=O)C(=O)N[C@H](C(=O)N[C@@H](C(N)=O)C(C)C)[C@@H](C)O</chem>       | 4000                            |

|                 |               |                                                                                                                                                          |         |
|-----------------|---------------|----------------------------------------------------------------------------------------------------------------------------------------------------------|---------|
| 12              | CHEMBL348612  | CC(=O)N[C@@H](Cc1ccc(OP(=O)(O)O)cc1)C(=O)N[C@@H](CC(C)C)C(=O)N[C@@H](CCCN=C(N)N)C(=O)N[C@H](CS)C(=O)N[C@H](CN[C@@H](CO)C(N)=O)CC(=O)O                    | 80000   |
| 13              | CHEMBL2371210 | CC(=O)N[C@@H](Cc1ccc(OP(=O)(O)O)cc1)C(=O)N[C@@H](CO)C(=O)N[C@H](C(=O)N[C@H](C(=O)N[C@H](C(=O)N[C@@H](Cc1c[nH]cn1)C(N)=O)C(C)C)C(C)C)[C@@H](C)O           | >150000 |
| 15              | CHEMBL348880  | CC(=O)N[C@@H](Cc1ccc(OP(=O)(O)O)cc1)C(=O)N[C@@H](CC(C)C)C(=O)N1CCC[C@@H]1C(N)=O                                                                          | 6000    |
| 16              | CHEMBL2373425 | CC(=O)N[C@@H](Cc1ccc(OP(=O)(O)O)cc1)C(=O)N[C@@H](CCCN=C(N)N)C(=O)N[C@@H](Cc1c[nH]cn1)C(=O)N[C@@H](CCC(N)=O)C(=O)N[C@H](C(=O)N1CCC[C@@H]1C(N)=O)C(C)C     | 6000    |
| 17              | CHEMBL423775  | CC(=O)N[C@@H](Cc1ccc(OP(=O)(O)O)cc1)C(=O)N[C@@H](Cc1ccc(O)cc1)C(=O)N[C@@H](CCCCN)C(=O)N[C@@H](CCC(N)=O)C(=O)N[C@@H](CC(N)=O)C(=O)N[C@@H](CS)C(N)=O       | 60000   |
| 18 <sup>a</sup> | CHEMBL348181  | CC(=O)N[C@@H](Cc1ccc(OP(=O)(O)O)cc1)C(=O)N[C@@H](CCC(N)=O)C(=O)N[C@@H](CCCCN)C(=O)N[C@@H](CCC(N)=O)C(=O)N[C@H](C(=O)N[C@@H](CCCN=C(N)N)C(N)=O)[C@@H](C)O | 8000    |
| 19 <sup>a</sup> | CHEMBL156465  | CC(=O)N[C@H](Cc1ccc(OP(=O)(O)O)cc1)C(=O)N[C@H](CC(C)C)C(=O)N1CCC[C@@H]1C(=O)N[C@@H](C)C(=O)N[C@H](C(=O)N[C@H](C(N)=O)C(C)C)[C@@H](C)O                    | 6000    |
| 20              | CHEMBL348182  | CC(=O)N[C@@H](Cc1ccc(OP(=O)(O)O)cc1)C(=O)N[C@@H](Cc1c[nH]cn1)C(=O)N[C@@H](CC(N)=O)C(=O)N[C@@H](CCC(N)=O)C(=O)N1CCC[C@@H]1C(=O)N[C@@H](CC(C)C)C(N)=O      | 150000  |
| 21              | CHEMBL158446  | CC(=O)N[C@@H](Cc1ccc(-c2nn[nH]n2)cc1)C(=O)N[C@@H](CC(C)C)C(=O)N1CCC[C@@H]1C(=O)N[C@@H](CCC(N)=O)C(=O)N[C@H](C(=O)N[C@H](C(N)=O)C(C)C)[C@@H](C)O          | 6000    |
| 22 <sup>a</sup> | CHEMBL345419  | CSCC[C@H](NC(=O)[C@H](C)NC(=O)[C@H](CCC(N)=O)NC(=O)[C@@H]1CCCN1C(=O)[C@@H](CCCN=C(N)N)NC(=O)[C@@H](Cc1ccc(OP(=O)(O)O)cc1)NC(C)=O)C(N)=O                  | 1000    |
| 23              | CHEMBL160353  | CC(=O)N[C@@H](Cc1ccc(OP(=O)(O)O)cc1)C(=O)N[C@@H](CC(C)C)C(=O)N1CCC[C@@H]1C(=O)N[C@H](CCC(N)=O)C(=O)N[C@@H](C(N)=O)[C@H](C)O                              | 600     |
| 24              | CHEMBL433511  | CC(=O)N[C@H](Cc1ccc(OP(=O)(O)O)cc1)C(=O)N[C@H](CC(C)C)C(=O)N1CCC[C@@H]1C(=O)N[C@@H](CC(N)=O)C(=O)N[C@H](C(=O)N[C@H](C(N)=O)C(C)C)[C@@H](C)O              | 2000    |

|                 |               |                                                                                                                                                    |       |
|-----------------|---------------|----------------------------------------------------------------------------------------------------------------------------------------------------|-------|
| 25              | CHEMBL157727  | CC(=O)N[C@@H](Cc1ccc(OP(=O)(O)O)cc1)C(=O)N[C@@H](CC(C)C)C(=O)N1CCC[C@@H]1C(=O)N[C@H](CCC(N)=O)C(=O)N[C@@H](C(=O)N[C@H](C)C(=O)O)[C@@H](C)O         | 400   |
| 26              | CHEMBL347438  | CC(=O)N[C@@H](Cc1ccc(O)cc1)C(=O)N[C@@H](CC(C)C)C(=O)N1CCC[C@@H]1C(=O)N[C@@H](CCC(N)=O)C(=O)N[C@H](C(=O)N[C@H](C(N)=O)C(C)C)[C@@H](C)O              | 6000  |
| 27              | CHEMBL351757  | CSCC[C@H](NC(=O)[C@H](Cc1ccc(OP(=O)(O)O)cc1)NC(C)=O)C(=O)N1CCC[C@@H]1C(=O)N[C@@H](CCC(N)=O)C(N)=O                                                  | 1500  |
| 28 <sup>a</sup> | CHEMBL2371211 | CC(=O)N[C@@H](Cc1ccc(OP(=O)(O)O)cc1)C(=O)N[C@@H](CC(C)C)C(=O)N[C@@H](CCCCN)C(=O)N[C@H](C(=O)N[C@@H](CCCCN)C(=O)N[C@@H](Cc1ccccc1)C(N)=O)[C@@H](C)O | 20000 |
| 29              | CHEMBL436427  | CC(=O)N[C@@H](Cc1ccc(OP(=O)(O)O)cc1)C(=O)N[C@@H](CC(C)C)C(=O)N[C@@H](CCCCN)C(=O)N[C@@H](CCC(N)=O)C(=O)N[C@@H](CCC(=O)O)C(=O)N[C@@H](CO)C(N)=O      | 6000  |
| 30              | CHEMBL160733  | CSCC[C@H](NC(=O)[C@H](CCC(N)=O)NC(=O)[C@H]1CCCN1C(=O)[C@H](CCCCN)NC(=O)[C@H](Cc1ccc(OP(=O)(O)O)cc1)NC(C)=O)C(=O)N[C@@H](Cc1c[nH]cn1)C(N)=O         | 400   |
| 31              | CHEMBL197719  | CC(=O)N[C@@H](Cc1ccc(OP(=O)(O)O)cc1)C(=O)N[C@@H](CC(C)C)C(=O)N1CCN(CC(=O)N[C@@H](CCC(N)=O)C(=O)N[C@H](C(N)=O)[C@@H](C)O)CC1                        | 57100 |
| 32              | CHEMBL370000  | CC(=O)N[C@@H](Cc1ccc(OP(=O)(O)O)cc1)C(=O)N[C@@H](CC(C)C)C(=O)N1CCC[C@H]1C(=O)N[C@@H](CCC(N)=O)C(=O)N1CCCCC1                                        | 7000  |
| 33              | CHEMBL371452  | CC(=O)N[C@@H](Cc1ccc(OP(=O)(O)O)cc1)C(=O)N[C@@H](CC(C)C)C(=O)N1CCC[C@H]1C(=O)N[C@@H](CC[S+](C)[O-])C(=O)N[C@H](C(N)=O)[C@@H](C)O                   | 9870  |
| 34 <sup>a</sup> | CHEMBL196561  | CC(=O)N[C@@H](Cc1ccc(OP(=O)(O)O)cc1)C(=O)N[C@@H](CC(C)C)C(=O)N1CCC[C@H]1C(=O)NCCCC(N)=O                                                            | 1780  |
| 35              | CHEMBL382978  | CC(=O)N[C@@H](Cc1ccc(OP(=O)(O)O)cc1)C(=O)N[C@@H](CC(C)C)C(=O)N1CCC[C@H]1C(=O)N[C@@H](CCC(N)=O)C(=O)N[C@H](C(N)=O)[C@@H](C)O                        | 600   |
| 36              | CHEMBL194446  | CC(=O)N[C@@H](Cc1ccc(OP(=O)(O)O)cc1)C(=O)N[C@@H](CC(C)C)C(=O)N1CCC[C@H]1C(=O)N1CCCC(C(N)=O)C1                                                      | 9810  |
| 37              | CHEMBL436319  | CC(=O)N[C@@H](Cc1ccc(OP(=O)(O)O)cc1)C(=O)N[C@@H](CC(C)C)C(=O)N1C[C@H]2C[C@H]2[C@H]1C(=O)N[C@@H](CCC(N)=O)C(=O)N[C@H](C(N)=O)[C@@H](C)O             | 3110  |

|                 |              |                                                                                                                                               |       |
|-----------------|--------------|-----------------------------------------------------------------------------------------------------------------------------------------------|-------|
| 38              | CHEMBL197513 | <chem>CCCC[C@H](NC(=O)[C@H](Cc1ccc(OP(=O)(O)O)cc1)NC(C)=O)C(=O)N1CCC[C@H]1C(=O)N[C@@H](CCC(N)=O)C(=O)N[C@H](C(N)=O)[C@@H](C)O</chem>          | 717   |
| 39              | CHEMBL197580 | <chem>CCC(=O)N[C@@H](Cc1ccc(OP(=O)(O)O)cc1)C(=O)N[C@@H](CC(C)C)C(=O)N1CCC[C@H]1C(=O)N[C@@H](CCC(N)=O)C(=O)N[C@H](C(N)=O)[C@@H](C)O</chem>     | 497   |
| 40              | CHEMBL366244 | <chem>CC(=O)N[C@@H](Cc1ccc(OP(=O)(O)O)cc1)C(=O)N[C@@H](CC(C)C)C(=O)N1CCC[C@H]1C(=O)N1CCCC(C(N)=O)C1</chem>                                    | 11800 |
| 41              | CHEMBL370095 | <chem>CC(=O)N[C@@H](Cc1ccc(OP(=O)(O)O)cc1)C(=O)N[C@@H](CC(C)C)C(=O)N1CCC[C@H]1C(=O)N1CCCC(C(N)=O)C1</chem>                                    | 882   |
| 42              | CHEMBL382709 | <chem>CC(=O)N[C@@H](Cc1ccc(OP(=O)(O)O)cc1)C(=O)N[C@@H](CC(C)C)C(=O)N1CCC[C@H]1C(=O)N[C@@H](CCC(N)=O)C(=O)N(C)C</chem>                         | 1850  |
| 43              | CHEMBL372758 | <chem>CC(=O)N[C@@H](Cc1ccc(OP(=O)(O)O)cc1)C(=O)N[C@@H](CC(C)C)C(=O)N1CC[C@H]1C(=O)N[C@@H](CCC(N)=O)C(=O)N[C@H](C(N)=O)[C@@H](C)O</chem>       | 1660  |
| 44 <sup>a</sup> | CHEMBL370547 | <chem>CC(=O)N[C@@H](Cc1ccc(OP(=O)(O)O)cc1)C(=O)N[C@@H](CC(C)C)C(=O)N1CC[C@H]1C(=O)N[C@@H](CCC(N)=O)C(=O)N[C@H](C(N)=O)[C@@H](C)O</chem>       | 13400 |
| 45              | CHEMBL194453 | <chem>CC(=O)N[C@@H](Cc1ccc(OP(=O)(O)O)cc1)C(=O)N[C@@H](CC(C)C)C(=O)N1CCC[C@H]1C(=O)N[C@@H](CCC(=O)N(C)C)C(=O)N[C@@H](C(N)=O)[C@@H](C)O</chem> | 80000 |
| 46              | CHEMBL193433 | <chem>CC(=O)N[C@@H](Cc1ccc(OP(=O)(O)O)cc1)C(=O)N[C@@H](CC(C)C)C(=O)N1CCC[C@H]1C(=O)N[C@@H](CCC(N)=O)C(=O)N[C@H](Cc1cccc1)</chem>              | 801   |
| 47 <sup>a</sup> | CHEMBL425747 | <chem>CC(=O)N[C@@H](Cc1ccc(OP(=O)(O)O)cc1)C(=O)N[C@@H](CC(C)C)C(=O)N1CCCC(C(=O)N[C@@H](CCC(N)=O)C(=O)N[C@H](C(N)=O)[C@@H](C)O)C1</chem>       | 38600 |
| 48              | CHEMBL371537 | <chem>CC[C@H](C)[C@H](NC(=O)[C@H](Cc1ccc(OP(=O)(O)O)cc1)NC(C)=O)C(=O)N1CCC[C@H]1C(=O)N[C@@H](CCC(N)=O)C(=O)N[C@H](C(N)=O)[C@@H](C)O</chem>    | 1070  |
| 49 <sup>a</sup> | CHEMBL371871 | <chem>CC(=O)N[C@@H](Cc1ccc(OP(=O)(O)O)cc1)C(=O)N[C@@H](CC1CC1)C(=O)N1CCC[C@H]1C(=O)N[C@@H](CCC(N)=O)C(=O)N[C@@H](C(N)=O)[C@@H](C)O</chem>     | 910   |
| 50              | CHEMBL372118 | <chem>CC(=O)N[C@@H](Cc1ccc(OP(=O)(O)O)cc1)C(=O)N[C@@H](CC(C)C)C(=O)N1CCC[C@@]1(C)C(=O)N[C@@H](CCC(N)=O)C(=O)N[C@@H](C(N)=O)[C@@H](C)O</chem>  | 1870  |

|                 |              |                                                                                                                                           |         |
|-----------------|--------------|-------------------------------------------------------------------------------------------------------------------------------------------|---------|
| 51              | CHEMBL371705 | CC(=O)N[C@@H](Cc1ccc(OP(=O)(O)O)cc1)C(=O)N[C@@H](CC(C)C)C(=O)N1CCCC[C@H]1C(=O)N[C@@H](CCC(N)=O)C(=O)N[C@@H](C(N)=O)[C@@H](C)O             | 1240    |
| 52              | CHEMBL196884 | CC(=O)N[C@@H](Cc1ccc(OP(=O)(O)O)cc1)C(=O)N[C@@H](CC(C)C)C(=O)N1CCC[C@H]1C(=O)N1CCN(CC(N)=O)CC1                                            | 1400    |
| 53              | CHEMBL382544 | CC(=O)N[C@@H](Cc1ccc(OP(=O)(O)O)cc1)C(=O)N[C@@H](CC(C)C)C(=O)N1CCCC[C@H]1C(=O)N[C@@H](CCC(N)=O)C(=O)O                                     | 748     |
| 54 <sup>a</sup> | CHEMBL436479 | CC(=O)N[C@@H](Cc1ccc(OP(=O)(O)O)cc1)C(=O)N[C@@H](CC(C)C)C(=O)N1CCC[C@H]1C(=O)N1CCC(CC(N)=O)C1                                             | 1690    |
| 55              | CHEMBL197658 | CC(=O)N[C@@H](Cc1ccc(OP(=O)(O)O)cc1)C(=O)N[C@@H](C(=O)N1CCC[C@H]1C(=O)N[C@@H](CCC(N)=O)C(=O)N[C@@H](C(N)=O)[C@@H](C)O)C(c1ccccc1)c1ccccc1 | >100000 |
| 56              | CHEMBL372993 | CC(=O)N[C@@H](Cc1ccc(OP(=O)(O)O)cc1)C(=O)N[C@@H](CC(C)C)C(=O)N1CCC[C@H]1C(=O)N[C@@H](CCC(N)=O)C(=O)N1CCCC1                                | 2110    |
| 57              | CHEMBL372429 | CC(=O)N[C@@H](Cc1ccc(OP(=O)(O)O)cc1)C(=O)N[C@@H](CC(C)C)C(=O)N1C[C@H](O)C[C@H]1C(=O)N[C@@H](CCC(N)=O)C(=O)N[C@@H](C(N)=O)[C@@H](C)O       | 484     |
| 58              | CHEMBL371056 | CC(=O)N[C@@H](Cc1ccc(OP(=O)(O)O)cc1)C(=O)N[C@@H](CC(C)C)C(=O)N1CCC(C(=O)N[C@@H](CCC(N)=O)C(=O)N[C@@H](C(N)=O)[C@@H](C)O)CC1               | 34600   |
| 59              | CHEMBL365749 | CC(=O)N[C@@H](Cc1ccc(OP(=O)(O)O)cc1)C(=O)N[C@@H](CC(C)C)C(=O)N1CCC[C@H]1C(=O)NCCCCC(N)=O                                                  | 9780    |
| 60              | CHEMBL196664 | CC(=O)N[C@@H](Cc1ccc(OP(=O)(O)O)cc1)C(=O)N[C@@H](CC(C)C)C(=O)N1CCC[C@H]1C(=O)N[C@@H](CCC(N)=O)C(=O)N(C)[C@@H](C(N)=O)[C@@H](C)O           | 1220    |
| 61              | CHEMBL370763 | CC(C)C[C@H](NC(=O)[C@H](Cc1ccc(OP(=O)(O)O)cc1)NC(=O)CCc1ccccc1)C(=O)N1C[C@H]2C[C@H]2[C@H]1C(=O)N[C@@H](CCC(N)=O)C(=O)NCc1ccccc1           | 125     |
| 62 <sup>a</sup> | CHEMBL370649 | CC(=O)N[C@@H](Cc1ccc(OP(=O)(O)O)cc1)C(=O)N[C@@H](CC(C)C)C(=O)N1CCC[C@H]1C(=O)N[C@@H](CCC(N)=O)C(=O)N[C@@H](C(N)=O)[C@@H](C)O              | >100000 |
| 63              | CHEMBL196122 | CC(=O)N[C@@H](Cc1ccc(OP(=O)(O)O)cc1)C(=O)N[C@@H](CC(C)C)C(=O)N1CCC[C@H]1C(=O)N[C@@H](CCS(C)(=O)=O)C(=O)N[C@@H](C(N)=O)[C@@H](C)O          | 13900   |

|                 |              |                                                                                                                                                          |         |
|-----------------|--------------|----------------------------------------------------------------------------------------------------------------------------------------------------------|---------|
| 64              | CHEMBL425571 | <chem>CC(C)C[C@H](NC(=O)[C@H](Cc1ccc(OP(=O)(O)O)cc1)NC(=O)c1ccc<br/>cc1)C(=O)N1CCC[C@H]1C(=O)N[C@@H](CCC(N)=O)C(=O)N[C@H<br/>](C(N)=O)[C@@H](C)O</chem>  | 814     |
| 65              | CHEMBL435121 | <chem>CC(C)C[C@H](NC(=O)[C@H](Cc1ccc(OP(=O)(O)O)cc1)NC(=O)OCc1<br/>cccc1)C(=O)N1CCC[C@H]1C(=O)N[C@@H](CCC(N)=O)C(=O)N[C<br/>@H](C(N)=O)[C@@H](C)O</chem> | 750     |
| 66 <sup>a</sup> | CHEMBL373124 | <chem>CC(=O)N[C@@H](Cc1ccc(OP(=O)(O)O)cc1)C(=O)N[C@@H](CC(C)<br/>C)C(=O)N1CCC[C@H]1C(=O)N1CCC(C(N)=O)CC1</chem>                                          | 3020    |
| 67              | CHEMBL370208 | <chem>CC(=O)N[C@@H](Cc1ccc(OP(=O)(O)O)cc1)C(=O)N[C@@H](CC(C)<br/>C)C(=O)N1CCC[C@H]1C(=O)N[C@@H](CCC(N)=O)C(=O)N[C@@<br/>H](C)c1cccc1</chem>              | 596     |
| 68              | CHEMBL194855 | <chem>CC(=O)N[C@@H](Cc1ccc(OP(=O)(O)O)cc1)C(=O)N[C@@H](CC(C)<br/>C)C(=O)N1CCC[C@H]1C(=O)N[C@@H](CCC(N)=O)C(=O)NCc1cccc<br/>c1</chem>                     | 409     |
| 69              | CHEMBL198548 | <chem>CC(=O)N[C@@H](Cc1ccc(OP(=O)(O)O)cc1)C(=O)N[C@H](C(=O)N1<br/>CCC[C@H]1C(=O)N[C@@H](CCC(N)=O)C(=O)N[C@H](C(N)=O)[C<br/>@@H](C)O)C(C)C</chem>         | 1540    |
| 70              | CHEMBL442785 | <chem>CC(=O)N[C@@H](Cc1ccc(OP(=O)(O)O)cc1)C(=O)N[C@@H](Cc1ccc<br/>cc1)C(=O)N1CCC[C@H]1C(=O)N[C@@H](CCC(N)=O)C(=O)N[C@H<br/>](C(N)=O)[C@@H](C)O</chem>    | 1890    |
| 71              | CHEMBL194427 | <chem>CC(=O)N[C@@H](Cc1ccc(OP(=O)(O)O)cc1)C(=O)N(C)[C@@H](CC(<br/>C)C)C(=O)N1CCC[C@H]1C(=O)N[C@@H](CCC(N)=O)C(=O)N[C@<br/>H](C(N)=O)[C@@H](C)O</chem>    | >100000 |
| 72 <sup>a</sup> | CHEMBL197844 | <chem>CC(C)C[C@H](NC(=O)[C@H](Cc1ccc(OP(=O)(O)O)cc1)NC(=O)CCc1<br/>cccc1)C(=O)N1CCC[C@H]1C(=O)N[C@@H](CCC(N)=O)C(=O)N[C<br/>@H](C(N)=O)[C@@H](C)O</chem> | 276     |
| 73              | CHEMBL373136 | <chem>CC(=O)N[C@@H](Cc1ccc(OP(=O)(O)O)cc1)C(=O)N[C@@H](CC(C)<br/>C)C(=O)N1CCC[C@H]1C(=O)Nc1cccc(C(N)=O)c1</chem>                                         | 36600   |
| 74              | CHEMBL436504 | <chem>CNC(=O)CC[C@H](NC(=O)[C@@H]1CCCN1C(=O)[C@H](CC(C)C)<br/>NC(=O)[C@H](Cc1ccc(OP(=O)(O)O)cc1)NC(C)=O)C(=O)N[C@H](C(<br/>N)=O)[C@@H](C)O</chem>        | 18100   |
| 75              | CHEMBL193800 | <chem>CCN(CC)C(=O)[C@H](CCC(N)=O)NC(=O)[C@@H]1CCCN1C(=O)[C<br/>@H](CC(C)C)NC(=O)[C@H](Cc1ccc(OP(=O)(O)O)cc1)NC(C)=O</chem>                               | 4220    |
| 76 <sup>a</sup> | CHEMBL508923 | <chem>O=C(Cc1ccc2c(c1)OCO2)NCCc1ccc(O)c(O)c1</chem>                                                                                                      | 357000  |
| 77              | CHEMBL524275 | <chem>Cc1oc(C)c2c(=O)cc(-c3ccc(O)c(O)c3)cc(O)c12</chem>                                                                                                  | 106000  |

|                 |              |                                                                                                                                                             |        |
|-----------------|--------------|-------------------------------------------------------------------------------------------------------------------------------------------------------------|--------|
| 78 <sup>a</sup> | CHEMBL414034 | <chem>CC(C)C[C@H](NC(=O)/C=C/c1ccc(OP(=O)(O)O)cc1)C(=O)N1CCC[C@H]1C(=O)N[C@@H](COC(N)=O)C(=O)NCc1ccccc1</chem>                                              | 379    |
| 79              | CHEMBL267246 | <chem>CC(C)C[C@H](NC(=O)/C=C/c1ccc(OP(=O)(O)O)cc1)C(=O)N1CCC[C@H]1C(=O)N[C@@H](CCC(N)=O)C(=O)NCc1ccccc1</chem>                                              | 135    |
| 80              | CHEMBL376795 | <chem>CC(C)C[C@H](NC(=O)/C=C/c1ccc(OP(=O)(O)O)cc1)C(=O)N1CCC[C@H]1C(=O)N[C@H](C(=O)NCc1ccccc1)[C@@H](C)OC(N)=O</chem>                                       | 850    |
| 81              | CHEMBL398067 | <chem>CC(C)C[C@H](NC(=O)[C@H](Cc1ccc(OP(=O)(O)O)cc1)NC(=O)c1ccc(C#N)cc1)C(=O)NCc1ccccc1</chem>                                                              | 800000 |
| 82              | CHEMBL412549 | <chem>COc1ccccc(NC(=O)[C@H](CC(C)C)NC(=O)[C@H](Cc2ccc(OP(=O)(O)O)cc2)NC(=O)c2ccc(C#N)cc2)c1</chem>                                                          | 31000  |
| 83              | CHEMBL393817 | <chem>CC(C)C[C@H](NC(=O)[C@H](Cc1ccc(OP(=O)(O)O)cc1)NC(=O)c1ccc(C#N)cc1)C(=O)NC1CCCCC1</chem>                                                               | 58000  |
| 84              | CHEMBL234465 | <chem>CC(C)CNC(=O)[C@H](CC(C)C)NC(=O)[C@H](Cc1ccc(OP(=O)(O)O)cc1)NC(=O)c1ccc(C#N)cc1</chem>                                                                 | 74000  |
| 85 <sup>a</sup> | CHEMBL234817 | <chem>CC(C)C[C@H](NC(=O)[C@H](Cc1ccc(OP(=O)(O)O)cc1)NC(=O)c1ccc(C#N)cc1)C(=O)NCc1ccccc1</chem>                                                              | 123000 |
| 86              | CHEMBL234466 | <chem>CC(C)C[C@H](NC(=O)[C@H](Cc1ccc(OP(=O)(O)O)cc1)NC(=O)c1ccc(C#N)cc1)C(=O)NCCCO</chem>                                                                   | 620000 |
| 87              | CHEMBL392556 | <chem>CC(C)C[C@H](NC(=O)[C@H](Cc1ccc(OP(=O)(O)O)cc1)NC(=O)c1ccc(C#N)cc1)C(=O)O</chem>                                                                       | 310000 |
| 88              | CHEMBL438852 | <chem>CC(C)C[C@H](NC(=O)[C@H](Cc1ccc(OP(=O)(O)O)cc1)NC(=O)c1ccc(C#N)cc1)C(=O)Nc1ccccc1</chem>                                                               | 310000 |
| 89              | CHEMBL439390 | <chem>CC(=O)N[C@@H](Cc1ccc(-c2nn[nH]n2)cc1)C(=O)N[C@@H](CC(C)C)C(=O)N1CCC[C@H]1C(=O)N[C@@H](CCC(N)=O)C(=O)N[C@H](C(=O)N[C@H](C(=O)O)C(C)C)[C@@H](C)O</chem> | 800000 |
| 90              | CHEMBL414897 | <chem>CC(=O)N[C@@H](Cc1ccc(OCC(=O)O)cc1)C(=O)N[C@@H](CC(C)C)C(=O)N1CCC[C@H]1C(=O)N[C@@H](CCC(N)=O)C(=O)N[C@H](C(=O)N[C@H](C(=O)O)C(C)C)[C@@H](C)O</chem>    | 1000   |
| 91              | CHEMBL231705 | <chem>CC(=O)N[C@@H](Cc1ccc(OCC(=O)O)cc1)C(=O)N[C@@H](CC(C)C)C(=O)N1CCC[C@H]1C(=O)N[C@@H](CCC(N)=O)C(=O)N[C@H](C(=O)N[C@H](C(=O)O)C(C)C)[C@@H](C)O</chem>    | 108000 |
| 92              | CHEMBL395165 | <chem>CC(=O)N[C@@H](Cc1ccc(OP(=O)(O)O)cc1)C(=O)N[C@@H](CC(C)C)C(=O)N1CCC[C@H]1C(=O)N[C@@H](CCC(N)=O)C(=O)N[C@H](C(=O)N[C@H](C(=O)O)C(C)C)[C@@H](C)O</chem>  | 9000   |

|                 |               |                                                                                                                                                |         |
|-----------------|---------------|------------------------------------------------------------------------------------------------------------------------------------------------|---------|
| 93 <sup>a</sup> | CHEMBL396939  | CC(=O)N[C@@H](Cc1ccc(CP(=O)(O)O)cc1)C(=O)N[C@@H](CC(C)C)C(=O)N1CCC[C@H]1C(=O)N[C@@H](CCC(N)=O)C(=O)N[C@H](C(=O)N[C@H](C(=O)O)C(C)C)[C@@H](C)O  | 138000  |
| 94              | CHEMBL233355  | CC(=O)N[C@@H](Cc1ccc(Cc2nn[nH]n2)cc1)C(=O)N[C@@H](CC(C)C)C(=O)N1CCC[C@H]1C(=O)N[C@@H](CCC(N)=O)C(=O)N[C@H](C(=O)N[C@H](C(=O)O)C(C)C)[C@@H](C)O | 1000    |
| 95              | CHEMBL443407  | CC(C)C[C@H](NC(=O)c1ccc2cc(OP(=O)(O)O)ccc2c1)C(=O)N1CCC[C@H]1C(=O)N[C@@H](CCC(N)=O)C(=O)N[C@H](C(N)=O)[C@@H](C)O                               | >100000 |
| 96              | CHEMBL471109  | CC(C)C[C@H](NC(=O)Cc1c[nH]c2ccc(OP(=O)(O)O)cc12)C(=O)N1CC[C@H]1C(=O)N[C@@H](CCC(N)=O)C(=O)N[C@H](C(N)=O)[C@@H](C)O                             | >100000 |
| 97              | CHEMBL505076  | CC(=O)N[C@@H](Cc1ccc(OP(=O)(O)O)cc1)C(=O)N[C@@H](CC(C)C)C(=O)N1CCC[C@H]1C(=O)N[C@@H](CCC(N)=O)C(=O)N[C@H](C(N)=O)[C@H](C)O                     | 739     |
| 98              | CHEMBL454365  | CNC(=O)[C@H](CCC(N)=O)NC(=O)[C@@H]1Cc2cccc3c2N1C(=O)[C@@H](NC(=O)/C=C/c1ccc(OP(=O)(O)O)cc1)CC3                                                 | 269     |
| 99              | CHEMBL2372260 | CC(=O)N1Cc2ccc(OP(=O)(O)O)cc2C[C@H]1C(=O)N[C@@H](CC(C)C)C(=O)N1CCC[C@H]1C(=O)N[C@@H](CCC(N)=O)C(=O)N[C@H](C(N)=O)[C@@H](C)O                    | >100000 |
| 100             | CHEMBL503765  | CC(=O)N[C@@H](Cc1ccc(OP(=O)(O)O)cc1)C(=O)N[C@H]1CCc2ccc3c2N(C1=O)[C@H](C(=O)N[C@@H](CCC(N)=O)C(=O)N[C@H](C(N)=O)[C@@H](C)O)C3                  | 231     |
| 101             | CHEMBL505207  | NC(=O)CC[C@H](NC(=O)[C@@H]1CC[C@H]2CC[C@H](NC(=O)/C=C/c3ccc(OP(=O)(O)O)cc3)C(=O)N12)C(=O)NCc1cccc1                                             | 45700   |
| 102             | CHEMBL449547  | NC(=O)CC[C@H](NC(=O)[C@@H]1Cc2cccc3c2N1C(=O)[C@@H](NC(=O)/C=C/c1ccc(OP(=O)(O)O)cc1)CC3)C(=O)NCc1cccc1                                          | 162     |
| 103             | CHEMBL515762  | NC(=O)C1CCN(C(=O)[C@@H]2Cc3cccc4c3N2C(=O)[C@@H](NC(=O)/C=C/c2ccc(OP(=O)(O)O)cc2)CC4)C1                                                         | 595     |
| 104             | CHEMBL503946  | C[S+](O-)[C@H](NC(=O)[C@@H]1Cc2cccc3c2N1C(=O)[C@@H](NC(=O)/C=C/c1ccc(OP(=O)(O)O)cc1)CC3)C(N)=O                                                 | 7600    |
| 105             | CHEMBL500738  | CC(C)C[C@H](NC(=O)/C=C/c1cccc(OP(=O)(O)O)c1)C(=O)N1CCC[C@H]1C(=O)N[C@@H](CCC(N)=O)C(=O)N[C@H](C(N)=O)[C@@H](C)O                                | >100000 |
| 106             | CHEMBL504218  | NC(=O)CC[C@H](NC(=O)[C@@H]1CC[C@H]2CC[C@H](NC(=O)/C=C/c3ccc(OP(=O)(O)O)cc3)C(=O)N21)C(=O)NCc1cccc1                                             | 59800   |



|                  |              |                                                                                                                                               |       |
|------------------|--------------|-----------------------------------------------------------------------------------------------------------------------------------------------|-------|
| 107 <sup>a</sup> | CHEMBL508912 | <chem>NC(=O)CC[C@H](NC(=O)[C@@H]1Cc2cccc3c2N1C(=O)[C@@H](NC(=O)/C=C/c1ccc(OP(=O)(O)O)cc1)C=C3)C(=O)NCc1cccc1</chem>                           | 195   |
| 108              | CHEMBL501981 | <chem>CC(=O)N[C@@H](Cc1ccc(OP(=O)(O)O)cc1)C(=O)N[C@@H]1CCc2cccc3c2N(C1=O)[C@H](C(=O)N[C@@H](CCC(N)=O)C(=O)N[C@H](C(N)=O)[C@@H](C)O)C3</chem>  | 1650  |
| 109 <sup>a</sup> | CHEMBL486267 | <chem>C[C@H](NC(=O)[C@@H]1Cc2cccc3c2N1C(=O)[C@@H](NC(=O)/C=C/c1ccc(OP(=O)(O)O)cc1)CC3)C(N)=O</chem>                                           | 25060 |
| 110              | CHEMBL485921 | <chem>CC(C)C[C@H](NC(=O)c1cc2cc(OP(=O)(O)O)ccc2[nH]1)C(=O)N1CCC[C@H]1C(=O)N[C@@H](CCC(N)=O)C(=O)N[C@H](C(N)=O)[C@@H](C)O</chem>               | 186   |
| 111              | CHEMBL504633 | <chem>CC(=O)N[C@@H](Cc1ccc(OP(=O)(O)O)cc1)C(=O)N[C@@H](CC(C)C)C(=O)N1c2cccc2[C@H]1C(=O)N[C@@H](CCC(N)=O)C(=O)N[C@@H](C(N)=O)[C@@H](C)O</chem> | 4640  |
| 112              | CHEMBL475488 | <chem>O=C(O)CCCN(C(=O)[C@@H]1Cc2cccc3c2N1C(=O)[C@@H](NC(=O)/C=C/c1ccc(OP(=O)(O)O)cc1)CC3</chem>                                               | 815   |
| 113 <sup>a</sup> | CHEMBL503365 | <chem>COC(=O)[C@H](CCC(N)=O)NC(=O)[C@@H]1Cc2cccc3c2N1C(=O)[C@@H](NC(=O)/C=C/c1ccc(OP(=O)(O)O)cc1)CC3</chem>                                   | 141   |
| 114              | CHEMBL447460 | <chem>CC(C)NC(=O)[C@H](CCC(N)=O)NC(=O)[C@@H]1Cc2cccc3c2N1C(=O)[C@@H](NC(=O)/C=C/c1ccc(OP(=O)(O)O)cc1)CC3</chem>                               | 815   |
| 115 <sup>a</sup> | CHEMBL470227 | <chem>CC(C)C[C@H](NC(=O)/C=C/c1ccc(OP(=O)(O)O)cc1)C(=O)N1CCC[C@H]1C(=O)N[C@@H](CCC(N)=O)C(=O)N[C@H](C(N)=O)[C@@H](C)O</chem>                  | 136   |
| 116 <sup>a</sup> | CHEMBL448296 | <chem>CC(=O)N[C@@H](Cc1ccc(OP(=O)(O)O)cc1)C(=O)N[C@H]1CC[C@H]2CC[C@@H](C(=O)N[C@@H](CCC(N)=O)C(=O)N[C@H](C(N)=O)[C@@H](C)O)N2C1=O</chem>      | 141   |
| 117              | CHEMBL502869 | <chem>CC(=O)N[C@@H](Cc1ccc(OP(=O)(O)O)cc1)C(=O)N[C@H]1CC[C@@H]2CC[C@H](C(=O)N[C@@H](CCC(N)=O)C(=O)N[C@H](C(N)=O)[C@@H](C)O)N2C1=O</chem>      | 24700 |
| 118              | CHEMBL510008 | <chem>NC(=O)CC[C@H](NC(=O)[C@@H]1Cc2cccc3c2N1C(=O)[C@@H](NC(=O)/C=C/c1ccc(OP(=O)(O)O)cc1)CC3)C(=O)O</chem>                                    | 359   |
| 119              | CHEMBL455671 | <chem>CS(=O)(=O)CC[C@H](NC(=O)[C@@H]1Cc2cccc3c2N1C(=O)[C@@H](NC(=O)/C=C/c1ccc(OP(=O)(O)O)cc1)CC3)C(N)=O</chem>                                | 7030  |
| 120              | CHEMBL449511 | <chem>NC(=O)CC[C@H](NC(=O)[C@@H]1Cc2cccc3c2N1C(=O)[C@@H](NC(=O)/C=C/c1ccc(OP(=O)(O)O)cc1)CC3)C(N)=O</chem>                                    | 233   |
| 121              | CHEMBL513887 | <chem>NC(=O)[C@@H]1Cc2cccc3c2N1C(=O)[C@@H](NC(=O)/C=C/c1ccc(OP(=O)(O)O)cc1)CC3</chem>                                                         | 35600 |

|                  |              |                                                                                                                                |       |
|------------------|--------------|--------------------------------------------------------------------------------------------------------------------------------|-------|
| 122              | CHEMBL508900 | <chem>C[C@@H](O)[C@H](NC(=O)[C@H](CCC(N)=O)NC(=O)[C@@H]1Cc2cccc3c2N1C(=O)[C@@H](NC(=O)CCc1ccc(OP(=O)(O)O)cc1)CC3)C(N)=O</chem> | 3240  |
| 123              | CHEMBL445970 | <chem>NC(=O)CC[C@H](NC(=O)[C@@H]1CC[C@@H]2CC[C@H](NC(=O)/C=C/c3ccc(OP(=O)(O)O)cc3)C(=O)N2)1C(=O)NCc1cccc1</chem>               | 604   |
| 124              | CHEMBL452194 | <chem>NC(=O)CC[C@H](NC(=O)[C@@H]1Cc2cccc3c2N1C(=O)[C@@H](NC(=O)c1cc2cc(OP(=O)(O)O)ccc2[nH]1)CC3)C(=O)NCc1cccc1</chem>          | 190   |
| 125 <sup>a</sup> | CHEMBL468082 | <chem>CCCC[C@H](NC(=O)[C@H](C)NC(=O)[C@@H]1Cc2cccc3c2N1C(=O)[C@@H](NC(=O)/C=C/c1ccc(OP(=O)(O)O)cc1)CC3)C(N)=O</chem>           | 19200 |
| 126 <sup>a</sup> | CHEMBL573901 | <chem>CC(C)C[C@H](NC(=O)/C=C/c1ccc(OP(=O)(O)O)cc1)C(=O)N1CCC[C@H]1C(=O)N[C@@H](CC(N)=O)C(=O)NCc1cccc1</chem>                   | 874   |
| 127 <sup>a</sup> | CHEMBL573930 | <chem>CC(C)C[C@H](NC(=O)/C=C/c1ccc(OP(=O)(O)O)cc1)C(=O)N1C[C@H]2C[C@H]2[C@H]1C(=O)N[C@@H](CCC(N)=O)C(C)C</chem>                | 511   |
| 128              | CHEMBL583726 | <chem>CC(=O)OC[C@H](CCC(N)=O)NC(=O)[C@@H]1[C@@H]2C[C@@H]2CN1C(=O)[C@H](CC(C)C)NC(=O)/C=C/c1ccc(OP(=O)(O)O)cc1</chem>           | 290   |
| 129              | CHEMBL573048 | <chem>CC(C)C[C@H](NC(=O)/C=C/c1ccc(OP(=O)(O)O)cc1)C(=O)N1CCC[C@H]1C(=O)NCCCC(N)=O</chem>                                       | 574   |
| 130              | CHEMBL575513 | <chem>CC(C)C[C@H](NC(=O)/C=C/c1ccc(OP(=O)(O)O)cc1)C(=O)N1CCC[C@H]1C(=O)N[C@@H](CCC(N)=O)CN(Cc1cccc1)Cc1cccc1</chem>            | 1080  |
| 131              | CHEMBL574844 | <chem>CC(C)C[C@H](CCC(N)=O)NC(=O)[C@@H]1CCCN1C(=O)[C@H](C(C)C)NC(=O)/C=C/c1ccc(OP(=O)(O)O)cc1</chem>                           | 4900  |
| 132              | CHEMBL573903 | <chem>CC(C)C[C@H](NC(=O)/C=C/c1ccc(OP(=O)(O)O)cc1)C(=O)N1CCC[C@H]1C(=O)N[C@@H](CCC(N)=O)Cc1ccc(O)cc1</chem>                    | 848   |
| 133 <sup>a</sup> | CHEMBL575919 | <chem>CC(C)C[C@H](NC(=O)/C=C/c1ccc(OP(=O)(O)O)cc1)C(=O)N1CCC[C@H]1C(=O)NCC#CC(N)=O</chem>                                      | 1140  |
| 134              | CHEMBL574636 | <chem>CC(C)C[C@H](NC(=O)/C=C/c1ccc(OP(=O)(O)O)cc1)C(=O)N1CCC[C@H]1C(=O)NCCNC(N)=O</chem>                                       | 131   |
| 135 <sup>a</sup> | CHEMBL577143 | <chem>CC(C)C[C@H](NC(=O)/C=C/c1ccc(OP(=O)(O)O)cc1)C(=O)N1C[C@H]2C[C@H]2[C@H]1C(=O)NCCCC(N)=O</chem>                            | 303   |
| 136              | CHEMBL573902 | <chem>CC(C)C[C@H](NC(=O)/C=C/c1ccc(OP(=O)(O)O)cc1)C(=O)N1CCC[C@H]1C(=O)N[C@H](COCc1cccc1)COC(N)=O</chem>                       | 454   |
| 137              | CHEMBL583116 | <chem>CCCC[C@H](CCC(N)=O)NC(=O)[C@@H]1[C@@H]2C[C@@H]2CN1C(=O)[C@H](CC(C)C)NC(=O)/C=C/c1ccc(OP(=O)(O)O)cc1</chem>               | 499   |
| 138              | CHEMBL573049 | <chem>CC(C)C[C@H](NC(=O)/C=C/c1ccc(OP(=O)(O)O)cc1)C(=O)N1CCC[C@H]1C(=O)N[C@@H](C)CCC(N)=O</chem>                               | 1180  |

|                  |              |                                                                                                                                                           |      |
|------------------|--------------|-----------------------------------------------------------------------------------------------------------------------------------------------------------|------|
| 139              | CHEMBL583756 | <chem>CC(C)C[C@H](NC(=O)/C=C/c1ccc(OP(=O)(O)O)cc1)C(=O)N1CCC[C@H]1C(=O)N[C@@H](COC(N)=O)[C@@H](C)OCc1ccccc1</chem>                                        | 6900 |
| 140              | CHEMBL576590 | <chem>CC(C)C[C@H](NC(=O)/C=C/c1ccc(OP(=O)(O)O)cc1)C(=O)N1CCC[C@H]1C(=O)NCCOC(N)=O</chem>                                                                  | 360  |
| 141              | CHEMBL573905 | <chem>CC(C)C[C@H](NC(=O)/C=C/c1ccc(OP(=O)(O)O)cc1)C(=O)N1CCC[C@H]1C(=O)N[C@@H](CCC(N)=O)CN1CCN(C)CC1</chem>                                               | 1310 |
| 142              | CHEMBL577593 | <chem>CC(C)C[C@H](NC(=O)/C=C/c1ccc(OP(=O)(O)O)cc1)C(=O)N1CCC[C@H]1C(=O)N[C@@H]1CN[C@H](C(N)=O)C1</chem>                                                   | 3210 |
| 143              | CHEMBL576785 | <chem>CCCC[C@H](CCC(N)=O)NC(=O)[C@@H]1CCCN1C(=O)[C@H](CC(C)C)NC(=O)/C=C/c1ccc(OP(=O)(O)O)cc1</chem>                                                       | 1350 |
| 144              | CHEMBL583727 | <chem>CC(C)C[C@H](NC(=O)/C=C/c1ccc(OP(=O)(O)O)cc1)C(=O)N1C[C@H]2C[C@H]2[C@H]1C(=O)N[C@@H](CCC(N)=O)COCc1ccccc1</chem>                                     | 94   |
| 145              | CHEMBL575098 | <chem>CC(C)C[C@H](NC(=O)/C=C/c1ccc(OP(=O)(O)O)cc1)C(=O)N1CCC[C@H]1C(=O)NCCCC(=O)NN</chem>                                                                 | 1830 |
| 146 <sup>a</sup> | CHEMBL583758 | <chem>CC(C)C[C@H](NC(=O)/C=C/c1ccc(OP(=O)(O)O)cc1)C(=O)N1CCC[C@H]1C(=O)N[C@@H](CCC(N)=O)[C@@H](C)OCc1ccccc1</chem>                                        | 272  |
| 147              | CHEMBL576784 | <chem>CC(C)C[C@H](NC(=O)/C=C/c1ccc(OP(=O)(O)O)cc1)C(=O)N1C[C@H]2C[C@H]2[C@H]1C(=O)N[C@H](C)CCC(N)=O</chem>                                                | 175  |
| 148 <sup>a</sup> | CHEMBL573068 | <chem>CC(C)C[C@H](NC(=O)/C=C/c1ccc(OP(=O)(O)O)cc1)C(=O)N1CCC[C@H]1C(=O)N[C@H]1CN[C@H](C(N)=O)C1</chem>                                                    | 3600 |
| 149              | CHEMBL584376 | <chem>CC(C)C[C@H](NC(=O)/C=C/c1ccc(OP(=O)(O)O)cc1)C(=O)N1CCC[C@H]1C(=O)N[C@H](C)COC(N)=O</chem>                                                           | 797  |
| 150              | CHEMBL575497 | <chem>CC(C)C[C@H](NC(=O)/C=C/c1ccc(OP(=O)(O)O)cc1)C(=O)N1C[C@H]2C[C@H]2[C@H]1C(=O)N[C@@H](CCC(N)=O)C(=O)NCc1ccccc1</chem>                                 | 68   |
| 151              | CHEMBL583754 | <chem>CC(C)C[C@H](NC(=O)/C=C/c1ccc(OP(=O)(O)O)cc1)C(=O)N1CCC[C@H]1C(=O)N[C@@H](CCCC(N)=O)C(=O)NCc1ccccc1</chem>                                           | 1400 |
| 152              | CHEMBL578430 | <chem>CC(C)C[C@H](NC(=O)/C=C/c1ccc(OP(=O)(O)O)cc1)C(=O)N1CCC[C@H]1C(=O)N1CCC[C@H]1CCC(N)=O</chem>                                                         | 3310 |
| 153              | CHEMBL502473 | <chem>CC(=O)N[C@@H](Cc1ccc(OP(=O)(O)O)cc1)C(=O)N[C@@H](CC(C)C)C(=O)N1CCC[C@H]1C(=O)N[C@@H](CCC(N)=O)C(=O)N[C@H](C(=O)N[C@H](C(N)=O)C(C)C)[C@H](C)O</chem> | 290  |
| 154              | CHEMBL574202 | <chem>CC(C)C[C@H](NC(=O)/C=C/c1ccc(OP(=O)(O)O)cc1)C(=O)N1CCC[C@H]1C(=O)NC/C=C\C(N)=O</chem>                                                               | 1110 |
| 155              | CHEMBL583725 | <chem>CC(C)C[C@H](NC(=O)/C=C/c1ccc(OP(=O)(O)O)cc1)C(=O)N1C[C@H]2C[C@H]2[C@H]1C(=O)N[C@@H](CCC(N)=O)[C@@H](C)O</chem>                                      | 437  |

|                  |               |                                                                                                                           |       |
|------------------|---------------|---------------------------------------------------------------------------------------------------------------------------|-------|
| 156 <sup>a</sup> | CHEMBL583138  | <chem>CC(C)C[C@H](NC(=O)/C=C/c1ccc(OP(=O)(O)O)cc1)C(=O)N1CCC[C@H]1C(=O)NCC(=O)NCc1ccccc1</chem>                           | 4940  |
| 157              | CHEMBL574654  | <chem>CC(C)C[C@H](NC(=O)/C=C/c1ccc(OP(=O)(O)O)cc1)C(=O)N1CCC[C@H]1C(N)=O</chem>                                           | 11400 |
| 158              | CHEMBL578233  | <chem>CC(C)C[C@H](NC(=O)/C=C/c1ccc(OP(=O)(O)O)cc1)C(=O)N1CCC[C@H]1C(=O)N[C@H](C)C(N)=O</chem>                             | 7800  |
| 159              | CHEMBL575920  | <chem>CC(C)C[C@H](NC(=O)/C=C/c1ccc(OP(=O)(O)O)cc1)C(=O)N1CCC[C@H]1C(=O)N[C@H](CCC(N)=O)C(C)C</chem>                       | 1880  |
| 160              | CHEMBL573904  | <chem>CC(C)C[C@H](NC(=O)/C=C/c1ccc(OP(=O)(O)O)cc1)C(=O)N1CCC[C@H]1C(=O)N[C@H](CCC(N)=O)COCc1ccccc1</chem>                 | 294   |
| 161              | CHEMBL583963  | <chem>CC(C)C[C@H](NC(=O)/C=C/c1ccc(OP(=O)(O)O)cc1)C(=O)N1CCC[C@H]1C(=O)N[C@H](CCC(N)=O)CN1CCCCC1</chem>                   | 1210  |
| 162 <sup>a</sup> | CHEMBL574875  | <chem>CC(C)C[C@H](NC(=O)/C=C/c1ccc(OP(=O)(O)O)cc1)C(=O)N1CCC[C@H]1C(=O)NCCCC(=O)NO</chem>                                 | 2640  |
| 163              | CHEMBL576736  | <chem>CC(C)C[C@H](NC(=O)/C=C/c1ccc(OP(=O)(O)O)cc1)C(=O)N1CCC[C@H]1C(=O)NCCCS(N)(=O)=O</chem>                              | 68200 |
| 164              | CHEMBL573069  | <chem>CC(C)C[C@H](NC(=O)/C=C/c1ccc(OP(=O)(O)O)cc1)C(=O)N1CCC[C@H]1C(=O)N[C@H](C)CNC(N)=O</chem>                           | 1350  |
| 165              | CHEMBL573643  | <chem>CC(C)C[C@H](NC(=O)/C=C/c1ccc(OP(=O)(O)O)cc1)C(=O)N1CCC[C@H]1C(=O)N[C@H](CCC(N)=O)COC(N)=O</chem>                    | 615   |
| 166              | CHEMBL584974  | <chem>CC(C)C[C@H](NC(=O)/C=C/c1ccc(OP(=O)(O)O)cc1)C(=O)N1CCC[C@H]1C(=O)N[C@H](CCC(N)=O)CN1CCOCC1</chem>                   | 1530  |
| 167              | CHEMBL573980  | <chem>CC(C)C[C@H](NC(=O)/C=C/c1ccc(OP(=O)(O)O)cc1)C(=O)N1CCC[C@H]1C(=O)N[C@H](CN)CCC(N)=O</chem>                          | 1240  |
| 168              | CHEMBL575484  | <chem>CC(C)C[C@H](CCC(N)=O)NC(=O)[C@H]1[C@@H]1[C@@H]2C[C@H]2C N1C(=O)[C@H](CC(C)C)NC(=O)/C=C/c1ccc(OP(=O)(O)O)cc1</chem>  | 1630  |
| 169              | CHEMBL573443  | <chem>CC(C)C[C@H](NC(=O)/C=C/c1ccc(OP(=O)(O)O)cc1)C(=O)N1C[C@H]2C[C@H]2[C@H]1C(=O)N[C@H](CCC(N)=O)[C@H](C)OCc1ccc1</chem> | 69    |
| 170              | CHEMBL573442  | <chem>CC(=O)NC[C@H](CCC(N)=O)NC(=O)[C@H]1CCCN1C(=O)[C@H](CC(C)C)NC(=O)/C=C/c1ccc(OP(=O)(O)O)cc1</chem>                    | 589   |
| 171              | CHEMBL578635  | <chem>CC(C)C[C@H](NC(=O)/C=C/c1ccc(OP(=O)(O)O)cc1)C(=O)N1CCC[C@H]1C(=O)N[C@H](C)CCC(N)=O</chem>                           | 110   |
| 172              | CHEMBL1290746 | <chem>Cc1ccc(C(=O)Nc2ccon2)cc1NC(=O)c1cnn(-c2ccccc2F)c1N</chem>                                                           | 10000 |
| 173              | CHEMBL1687978 | <chem>O=C(Nc1nnc(-c2ccco2)o1)c1cc(-c2ccccc3ccccc23)nc2ccccc12</chem>                                                      | 55000 |
| 174              | CHEMBL1687967 | <chem>O=C(Nc1nnc(-c2ccc(Cl)cc2)o1)c1cc(-c2ccccc2)nc2ccccc12</chem>                                                        | 61000 |

|                  |               |                                                                                                                                                                 |        |
|------------------|---------------|-----------------------------------------------------------------------------------------------------------------------------------------------------------------|--------|
| 175              | CHEMBL1687977 | <chem>O=C(Nc1nnc(-c2ccco2)o1)c1cc(-c2ccco2)nc2ccccc12</chem>                                                                                                    | 66000  |
| 176              | CHEMBL1687965 | <chem>O=C(Nc1nnc(-c2ccoc2)o1)c1cc(-c2ccccc2)nc2ccccc12</chem>                                                                                                   | 72000  |
| 177 <sup>a</sup> | CHEMBL1687969 | <chem>O=C(Nc1nnc(-c2ccccc2)o1)c1cc(-c2ccccc2)nc2ccccc12</chem>                                                                                                  | 66000  |
| 178              | CHEMBL1687966 | <chem>O=C(Nc1nnc(Cc2ccccc2)o1)c1cc(-c2ccccc2)nc2ccccc12</chem>                                                                                                  | 75000  |
| 179              | CHEMBL1562195 | <chem>O=C(Nc1nnc(-c2cccs2)o1)c1cc(-c2ccccc2)nc2ccccc12</chem>                                                                                                   | 75000  |
| 180              | CHEMBL1687979 | <chem>O=C(Nc1nnc(-c2ccco2)o1)c1cc(-c2ccccc2)nc2ccccc12</chem>                                                                                                   | 74000  |
| 181              | CHEMBL1687976 | <chem>O=C(Nc1nnc(-c2ccco2)o1)c1cc(-c2cccs2)nc2ccccc12</chem>                                                                                                    | 63000  |
| 182              | CHEMBL2172008 | <chem>CCN1C(=O)/C(=C/c2ccc(-c3ccc(C(=O)O)cc3)o2)SC1=S</chem>                                                                                                    | 30000  |
| 183 <sup>a</sup> | CHEMBL2031566 | <chem>O=C(O)CSc1cc(NS(=O)(=O)c2ccc(C(=O)O)cc2)c2ccccc2c1O</chem>                                                                                                | 73000  |
| 184              | CHEMBL2171900 | <chem>COC(=O)Cc1c(C)c2ccc(OCc3ccc(C(=O)OC)cc3)c(C)c2oc1=O</chem>                                                                                                | 63000  |
| 185              | CHEMBL2171898 | <chem>O=C(O)c1ccc(/C=C/C(=O)c2ccc3c(c2)OCCO3)cc1</chem>                                                                                                         | 91000  |
| 186              | CHEMBL2171899 | <chem>CCOc1cc(C=C2C(=O)c3ccccc3C2=O)cc(Cl)c1OCc1cccc(C(=O)O)c1</chem>                                                                                           | 144000 |
| 187              | CHEMBL2172009 | <chem>CCN1C(=O)C(=Cc2ccc(-c3ccc(C(=O)O)ccc3Cl)o2)C(=O)N(CC)C1=S</chem>                                                                                          | 114000 |
| 188              | CHEMBL187460  | <chem>C[C@H]1COC2=C1C(=O)C(=O)c1c2ccc2c1CCCC2(C)C</chem>                                                                                                        | 4600   |
| 189              | CHEMBL207155  | <chem>C1=Cc2nc1cc1ccc([nH]1)c(-c1ccccc1)c1nc(cc3ccc([nH]3)c2-c2ccccc2)C=C1</chem>                                                                               | 280    |
| 190              | CHEMBL1337170 | <chem>O=[N+](([O-])c1ccc2c(c1)S(=O)(=O)C=C2</chem>                                                                                                              | 5100   |
| 192              | CHEMBL2347240 | <chem>Oc1ccc(NCc2cc(Cl)ccc2OCc2ccc(Cl)cc2)cc1</chem>                                                                                                            | 26680  |
| 193              | CHEMBL2367507 | <chem>CC(C)C[C@H](NC(=O)[C@H](Cc1ccc(O)cc1)NC(=O)[C@H]1CCCN1C(=O)CN)C(=O)N1CCC[C@H]1C(=O)N[C@@H](CCC(N)=O)C(=O)N[C@H](C(=O)N[C@H](C(N)=O)C(C)C)[C@H](C)O</chem> | 300    |
| 194              | CHEMBL2431922 | <chem>O=C(O)c1ccc(N(Cc2ccc(C3CCCC3)cc2)C(=O)CN(Cc2ccc(F)cc2)S(=O)(=O)c2c(F)c(F)c(F)c(F)c2F)cc1O</chem>                                                          | 17600  |
| 195              | CHEMBL2431990 | <chem>Cc1ccc(S(=O)(=O)N(CC(=O)N(Cc2ccc(C3CCCC3)cc2)c2ccc(C(=O)O)c(O)c2)Cc2ccccc2C)cc1</chem>                                                                    | 8800   |
| 196              | CHEMBL2431924 | <chem>O=C(O)c1ccc(N(Cc2ccc(C3CCCC3)cc2)C(=O)CN(Cc2ccccc(Cl)c2)S(=O)(=O)c2c(F)c(F)c(F)c(F)c2F)cc1O</chem>                                                        | 18200  |
| 197              | CHEMBL2429889 | <chem>Cc1ccc(S(=O)(=O)N(CC(=O)N(Cc2ccc(C3CCCC3)cc2)c2ccc(C(=O)O)c(O)c2)Cc2cc(F)c(F)c(F)c2F)cc1</chem>                                                           | 22200  |
| 198              | CHEMBL2431991 | <chem>Cc1ccc(S(=O)(=O)N(CC(=O)N(Cc2ccc(C3CCCC3)cc2)c2ccc(C(=O)O)c(O)c2)Cc2ccccc(C)c2)cc1</chem>                                                                 | 5200   |
| 199              | CHEMBL2431959 | <chem>O=C(O)c1ccc(N(Cc2ccc(C3CCCC3)cc2)C(=O)CN(Cc2ccccc(F)c2)S(=O)(=O)c2c(F)c(F)c(F)c(F)c2F)cc1O</chem>                                                         | 17800  |
| 200              | CHEMBL2431977 | <chem>Cc1ccc(S(=O)(=O)N(CC(=O)N(Cc2ccc(C3CCCC3)cc2)c2ccc(C(=O)O)c(O)c2)Cc2ccncc2)cc1</chem>                                                                     | 46600  |

|                  |               |                                                                                                                |        |
|------------------|---------------|----------------------------------------------------------------------------------------------------------------|--------|
| 201 <sup>a</sup> | CHEMBL2431971 | <chem>Cc1ccc(S(=O)(=O)N(CC(=O)N(Cc2ccc(C3CCCCC3)cc2)c2ccc(C(=O)O)c(O)c2)Cc2ccc([N+](=O)[O-])cc2)cc1</chem>     | 11000  |
| 202              | CHEMBL2431993 | <chem>Cc1ccc(S(=O)(=O)N(CC(=O)N(Cc2ccc(C3CCCCC3)cc2)c2ccc(C(=O)O)c(O)c2)Cc2ccccc2C(F)(F)F)cc1</chem>           | 2800   |
| 203              | CHEMBL2431985 | <chem>CCCN(CC(=O)N(Cc1ccc(C2CCCC2)cc1)c1ccc(C(=O)O)c(O)c1)S(=O)(=O)c1ccc(C)cc1</chem>                          | 17800  |
| 204              | CHEMBL2431967 | <chem>Cc1ccc(S(=O)(=O)N(CC(=O)N(Cc2ccc(C3CCCCC3)cc2)c2ccc(C(=O)O)c(O)c2)Cc2ccccc(OC(F)(F)F)c2)cc1</chem>       | 8000   |
| 205 <sup>a</sup> | CHEMBL2431975 | <chem>Cc1ccc(S(=O)(=O)N(CC(=O)N(Cc2ccc(C3CCCCC3)cc2)c2ccc(C(=O)O)c(O)c2)Cc2cccn2)cc1</chem>                    | 45200  |
| 206 <sup>a</sup> | CHEMBL2431995 | <chem>Cc1ccc(S(=O)(=O)N(CC(=O)N(Cc2ccc(C3CCCCC3)cc2)c2ccc(C(=O)O)c(O)c2)Cc2ccc(C(F)(F)F)cc2)cc1</chem>         | 9200   |
| 207 <sup>a</sup> | CHEMBL1829876 | <chem>CN(CC(=O)N(Cc1ccc(C2CCCC2)cc1)c1ccc(C(=O)O)c(O)c1)S(=O)(=O)c1c(F)c(F)c(F)c(F)c1F</chem>                  | 25600  |
| 208 <sup>a</sup> | CHEMBL2431992 | <chem>Cc1ccc(CN(CC(=O)N(Cc2ccc(C3CCCCC3)cc2)c2ccc(C(=O)O)c(O)c2)S(=O)(=O)c2ccc(C)cc2)cc1</chem>                | 50000  |
| 209              | CHEMBL2431932 | <chem>O=C(O)c1ccc(N(Cc2ccc(C3CCCCC3)cc2)C(=O)CN(Cc2cc(F)c(F)c(F)c2F)S(=O)(=O)c2c(F)c(F)c(F)c(F)c2F)cc1O</chem> | 12400  |
| 210              | CHEMBL2431955 | <chem>O=C(O)c1ccc(N(Cc2ccc(C3CCCCC3)cc2)C(=O)CN(Cc2ccccc2C(F)(F)F)S(=O)(=O)c2c(F)c(F)c(F)c(F)c2F)cc1O</chem>   | 12800  |
| 211              | CHEMBL2431969 | <chem>Cc1ccc(S(=O)(=O)N(CC(=O)N(Cc2ccc(C3CCCCC3)cc2)c2ccc(C(=O)O)c(O)c2)Cc2ccccc2[N+](=O)[O-])cc1</chem>       | 10000  |
| 212 <sup>a</sup> | CHEMBL2431986 | <chem>Cc1ccc(S(=O)(=O)N(CC(=O)N(Cc2ccc(C3CCCCC3)cc2)c2ccc(C(=O)O)c(O)c2)CC(C)C)cc1</chem>                      | 17000  |
| 213              | CHEMBL2431981 | <chem>Cc1ccc(S(=O)(=O)NCC(=O)Nc2ccc(C(=O)O)c(O)c2)cc1</chem>                                                   | 300000 |
| 214              | CHEMBL2431961 | <chem>Cc1ccc(S(=O)(=O)N(CC(=O)N(Cc2ccc(C3CCCCC3)cc2)c2ccc(C(=O)O)c(O)c2)Cc2ccccc(F)c2)cc1</chem>               | 9000   |
| 215              | CHEMBL2023989 | <chem>Cc1ccc(S(=O)(=O)N(CC(=O)N(Cc2ccc(C3CCCCC3)cc2)c2ccc(C(=O)O)c(O)c2)C(=O)OC(C)(C)C)cc1</chem>              | 115000 |
| 216              | CHEMBL2431974 | <chem>Cc1ccc(S(=O)(=O)N(CC(=O)N(Cc2ccc(C3CCCCC3)cc2)c2ccc(C(=O)O)c(O)c2)Cc2ccc(N)cc2)cc1</chem>                | 20800  |
| 217              | CHEMBL2431984 | <chem>Cc1ccc(S(=O)(=O)NCC(=O)N(Cc2ccc(C3CCCCC3)cc2)c2ccc(C(=O)O)c(O)c2)cc1</chem>                              | 50000  |
| 218              | CHEMBL2431939 | <chem>Cc1ccc(S(=O)(=O)N(CC(=O)N(Cc2ccc(C3CCCCC3)cc2)c2ccc(C(=O)O)c(O)c2)Cc2c(F)cc(F)c(F)c2F)cc1</chem>         | 15400  |

|                  |               |                                                                                                                 |        |
|------------------|---------------|-----------------------------------------------------------------------------------------------------------------|--------|
| 219              | CHEMBL2431968 | <chem>Cc1ccc(S(=O)(=O)N(CC(=O)N(Cc2ccc(C3CCCCC3)cc2)c2ccc(C(=O)O)c(O)c2)Cc2ccc(OC(F)(F)F)cc2)cc1</chem>         | 11800  |
| 220              | CHEMBL2431988 | <chem>Cc1ccc(S(=O)(=O)N(CC(N)=O)CC(=O)N(Cc2ccc(C3CCCCC3)cc2)c2ccc(C(=O)O)c(O)c2)cc1</chem>                      | 50000  |
| 221 <sup>a</sup> | CHEMBL2431936 | <chem>O=C(O)c1ccc(N(Cc2ccc(C3CCCCC3)cc2)C(=O)CN(Cc2ccc3ccccc3c2)S(=O)(=O)c2c(F)c(F)c(F)c(F)c2F)cc1O</chem>      | 21800  |
| 222              | CHEMBL2431949 | <chem>CCCN(CC(=O)N(Cc1ccc(C2CCCC2)cc1)c1ccc(C(=O)O)c(O)c1)S(=O)(=O)c1c(F)c(F)c(F)c(F)c1F</chem>                 | 20600  |
| 223              | CHEMBL2431923 | <chem>O=C(O)c1ccc(N(Cc2ccc(C3CCCCC3)cc2)C(=O)CN(Cc2ccccc2Cl)S(=O)(=O)c2c(F)c(F)c(F)c(F)c2F)cc1O</chem>          | 11000  |
| 224 <sup>a</sup> | CHEMBL2431925 | <chem>O=C(O)c1ccc(N(Cc2ccc(C3CCCCC3)cc2)C(=O)CN(Cc2ccc(Cl)cc2)S(=O)(=O)c2c(F)c(F)c(F)c(F)c2F)cc1O</chem>        | 13800  |
| 225              | CHEMBL2431958 | <chem>O=C(O)c1ccc(N(Cc2ccc(C3CCCCC3)cc2)C(=O)CN(Cc2ccccc2F)S(=O)(=O)c2c(F)c(F)c(F)c(F)c2F)cc1O</chem>           | 28000  |
| 226              | CHEMBL2431946 | <chem>COC(=O)c1cccc(CN(CC(=O)N(Cc2ccc(C3CCCCC3)cc2)c2ccc(C(=O)O)c(O)c2)S(=O)(=O)c2ccc(C)cc2)c1</chem>           | 18400  |
| 227 <sup>a</sup> | CHEMBL2431982 | <chem>Cc1ccc(S(=O)(=O)N(C)CC(=O)Nc2ccc(C(=O)O)c(O)c2)cc1</chem>                                                 | 300000 |
| 228 <sup>a</sup> | CHEMBL2172013 | <chem>Cc1ccc(S(=O)(=O)OCC(=O)N(Cc2ccc(C3CCCCC3)cc2)c2ccc(C(=O)O)c(O)c2)cc1</chem>                               | 43000  |
| 229              | CHEMBL2431928 | <chem>O=C(O)c1ccc(N(Cc2ccc(C3CCCCC3)cc2)C(=O)CN(Cc2ccc(OC(F)(F)F)cc2)S(=O)(=O)c2c(F)c(F)c(F)c(F)c2F)cc1O</chem> | 21600  |
| 230              | CHEMBL2431979 | <chem>Cc1ccc(S(=O)(=O)N(CC(=O)N(Cc2ccc(C3CCCCC3)cc2)c2ccc(C(=O)O)c(O)c2)Cc2cccc(C#N)c2)cc1</chem>               | 12400  |
| 231              | CHEMBL2431972 | <chem>Cc1ccc(S(=O)(=O)N(CC(=O)N(Cc2ccc(C3CCCCC3)cc2)c2ccc(C(=O)O)c(O)c2)Cc2ccccc2N)cc1</chem>                   | 24000  |
| 232              | CHEMBL2431989 | <chem>Cc1ccc(S(=O)(=O)N(CC(=O)N(Cc2ccc(C3CCCCC3)cc2)c2ccc(C(=O)O)c(O)c2)Cc2ccccc2)cc1</chem>                    | 14400  |
| 233 <sup>a</sup> | CHEMBL2431950 | <chem>CC(C)(C)OC(=O)N(CC(=O)N(Cc1ccc(C2CCCC2)cc1)c1ccc(C(=O)O)c(O)c1)S(=O)(=O)c1c(F)c(F)c(F)c(F)c1F</chem>      | 27400  |
| 234              | CHEMBL2431964 | <chem>Cc1ccc(S(=O)(=O)N(CC(=O)N(Cc2ccc(C3CCCCC3)cc2)c2ccc(C(=O)O)c(O)c2)Cc2cccc(Cl)c2)cc1</chem>                | 6000   |
| 235              | CHEMBL2431976 | <chem>Cc1ccc(S(=O)(=O)N(CC(=O)N(Cc2ccc(C3CCCCC3)cc2)c2ccc(C(=O)O)c(O)c2)Cc2ccccc2)cc1</chem>                    | 50000  |
| 236              | CHEMBL2431941 | <chem>Cc1ccc(S(=O)(=O)N(CC(=O)N(Cc2ccc(C3CCCCC3)cc2)c2ccc(C(=O)O)c(O)c2)Cc2c(F)c(F)c(F)c(F)c2F)cc1</chem>       | 8100   |

|                  |               |                                                                                                                 |        |
|------------------|---------------|-----------------------------------------------------------------------------------------------------------------|--------|
| 237              | CHEMBL2431978 | <chem>Cc1ccc(S(=O)(=O)N(CC(=O)N(Cc2ccc(C3CCCCC3)cc2)c2ccc(C(=O)O)c(O)c2)Cc2ccccc2C#N)cc1</chem>                 | 22600  |
| 238              | CHEMBL2431951 | <chem>O=C(O)c1ccc(N(Cc2ccc(C3CCCCC3)cc2)C(=O)CN(Cc2ccccc2)S(=O)(=O)c2c(F)c(F)c(F)c(F)c2F)cc1O</chem>            | 14400  |
| 239              | CHEMBL2431956 | <chem>O=C(O)c1ccc(N(Cc2ccc(C3CCCCC3)cc2)C(=O)CN(Cc2ccc(C(F)(F)F)c2)S(=O)(=O)c2c(F)c(F)c(F)c(F)c2F)cc1O</chem>   | 9600   |
| 240              | CHEMBL2431938 | <chem>COC(=O)c1cccc(CN(CC(=O)N(Cc2ccc(C3CCCCC3)cc2)c2ccc(C(=O)O)c(O)c2)S(=O)(=O)c2c(F)c(F)c(F)c(F)c2F)c1</chem> | 30800  |
| 241 <sup>a</sup> | CHEMBL2431931 | <chem>N#Cc1ccc(CN(CC(=O)N(Cc2ccc(C3CCCCC3)cc2)c2ccc(C(=O)O)c(O)c2)S(=O)(=O)c2c(F)c(F)c(F)c(F)c2F)cc1</chem>     | 9400   |
| 242 <sup>a</sup> | CHEMBL2431953 | <chem>Cc1cccc(CN(CC(=O)N(Cc2ccc(C3CCCCC3)cc2)c2ccc(C(=O)O)c(O)c2)S(=O)(=O)c2c(F)c(F)c(F)c(F)c2F)c1</chem>       | 14600  |
| 243              | CHEMBL2431948 | <chem>O=C(O)c1ccc(N(Cc2ccc(C3CCCCC3)cc2)C(=O)CNS(=O)(=O)c2c(F)c(F)c(F)c(F)c2F)cc1O</chem>                       | 32400  |
| 244              | CHEMBL2431957 | <chem>O=C(O)c1ccc(N(Cc2ccc(C3CCCCC3)cc2)C(=O)CN(Cc2ccc(C(F)(F)F)c2)S(=O)(=O)c2c(F)c(F)c(F)c(F)c2F)cc1O</chem>   | 22000  |
| 245              | CHEMBL2431987 | <chem>C=CCN(CC(=O)N(Cc1ccc(C2CCCCC2)cc1)c1ccc(C(=O)O)c(O)c1)S(=O)(=O)c1ccc(C)cc1</chem>                         | 50000  |
| 246 <sup>a</sup> | CHEMBL2431965 | <chem>Cc1ccc(S(=O)(=O)N(CC(=O)N(Cc2ccc(C3CCCCC3)cc2)c2ccc(C(=O)O)c(O)c2)Cc2ccc(Cl)cc2)cc1</chem>                | 6200   |
| 247              | CHEMBL2431927 | <chem>O=C(O)c1ccc(N(Cc2ccc(C3CCCCC3)cc2)C(=O)CN(Cc2ccc(OC(F)(F)F)c2)S(=O)(=O)c2c(F)c(F)c(F)c(F)c2F)cc1O</chem>  | 17800  |
| 248              | CHEMBL2431934 | <chem>O=C(O)c1ccc(N(Cc2ccc(C3CCCCC3)cc2)C(=O)CN(Cc2c(F)c(F)cc(F)c2)F)S(=O)(=O)c2c(F)c(F)c(F)c(F)c2F)cc1O</chem> | 16600  |
| 249 <sup>a</sup> | CHEMBL2431945 | <chem>CCOC(=O)c1ccc(CN(CC(=O)N(Cc2ccc(C3CCCCC3)cc2)c2ccc(C(=O)O)c(O)c2)S(=O)(=O)c2ccc(C)cc2)cc1</chem>          | 7600   |
| 250 <sup>a</sup> | CHEMBL2431942 | <chem>Cc1ccc(S(=O)(=O)N(CC(=O)N(Cc2ccc(C3CCCCC3)cc2)c2ccc(C(=O)O)c(O)c2)Cc2ccc3ccccc3c2)cc1</chem>              | 5000   |
| 251              | CHEMBL2431966 | <chem>Cc1ccc(S(=O)(=O)N(CC(=O)N(Cc2ccc(C3CCCCC3)cc2)c2ccc(C(=O)O)c(O)c2)Cc2ccccc2OC(F)(F)F)cc1</chem>           | 7200   |
| 252              | CHEMBL2431970 | <chem>Cc1ccc(S(=O)(=O)N(CC(=O)N(Cc2ccc(C3CCCCC3)cc2)c2ccc(C(=O)O)c(O)c2)Cc2ccccc([N+](=O)[O-])c2)cc1</chem>     | 5000   |
| 253              | CHEMBL2431983 | <chem>Cc1ccc(S(=O)(=O)N(CC(=O)Nc2ccc(C(=O)O)c(O)c2)C(=O)OC(C)(C)C)cc1</chem>                                    | 300000 |
| 254              | CHEMBL2431943 | <chem>Cc1ccc(S(=O)(=O)N(CC(=O)N(Cc2ccc(C3CCCCC3)cc2)c2ccc(C(=O)O)c(O)c2)Cc2ccc(F)cc2C(F)(F)F)cc1</chem>         | 11000  |



|                  |               |                                                                                                                     |       |
|------------------|---------------|---------------------------------------------------------------------------------------------------------------------|-------|
| 255              | CHEMBL2431933 | <chem>O=C(O)c1ccc(N(Cc2ccc(C3CCCCC3)cc2)C(=O)CN(Cc2c(F)cc(F)c(F)c2F)cc1O)S(=O)(=O)c2c(F)c(F)c(F)c(F)c2F)cc1O</chem> | 17600 |
| 256              | CHEMBL2431963 | <chem>Cc1ccc(S(=O)(=O)N(CC(=O)N(Cc2ccc(C3CCCCC3)cc2)c2ccc(C(=O)O)c(O)c2)Cc2ccccc2Cl)cc1</chem>                      | 15800 |
| 257              | CHEMBL2431935 | <chem>O=C(O)c1ccc(N(Cc2ccc(C3CCCCC3)cc2)C(=O)CN(Cc2c(F)c(F)c(F)c(F)c2F)S(=O)(=O)c2c(F)c(F)c(F)c(F)c2F)cc1O</chem>   | 11000 |
| 258              | CHEMBL2431947 | <chem>COC(=O)c1ccc(CN(CC(=O)N(Cc2ccc(C3CCCCC3)cc2)c2ccc(C(=O)O)c(O)c2)S(=O)(=O)c2ccc(C)cc2)cc1</chem>               | 11600 |
| 259              | CHEMBL2431954 | <chem>Cc1ccc(CN(CC(=O)N(Cc2ccc(C3CCCCC3)cc2)c2ccc(C(=O)O)c(O)c2)S(=O)(=O)c2c(F)c(F)c(F)c(F)c2F)cc1</chem>           | 14400 |
| 260              | CHEMBL2431994 | <chem>Cc1ccc(S(=O)(=O)N(CC(=O)N(Cc2ccc(C3CCCCC3)cc2)c2ccc(C(=O)O)c(O)c2)Cc2ccccc(C(F)(F)F)c2)cc1</chem>             | 10200 |
| 261 <sup>a</sup> | CHEMBL2431937 | <chem>COC(=O)c1cccc1CN(CC(=O)N(Cc1ccc(C2CCCC2)cc1)c1ccc(C(=O)O)c(O)c1)S(=O)(=O)c1c(F)c(F)c(F)c(F)c1F</chem>         | 17400 |
| 262 <sup>a</sup> | CHEMBL1829786 | <chem>Cc1ccc(S(=O)(=O)N(C)CC(=O)N(Cc2ccc(C3CCCCC3)cc2)c2ccc(C(=O)O)c(O)c2)cc1</chem>                                | 31000 |
| 263              | CHEMBL2431952 | <chem>Cc1cccc1CN(CC(=O)N(Cc1ccc(C2CCCC2)cc1)c1ccc(C(=O)O)c(O)c1)S(=O)(=O)c1c(F)c(F)c(F)c(F)c1F</chem>               | 11800 |
| 264              | CHEMBL2431926 | <chem>O=C(O)c1ccc(N(Cc2ccc(C3CCCCC3)cc2)C(=O)CN(Cc2ccccc2OC(F)(F)F)S(=O)(=O)c2c(F)c(F)c(F)c(F)c2F)cc1O</chem>       | 10200 |
| 265              | CHEMBL2431944 | <chem>Cc1ccc(S(=O)(=O)N(CC(=O)N(Cc2ccc(C3CCCCC3)cc2)c2ccc(C(=O)O)c(O)c2)Cc2ccc(SC(F)(F)F)cc2)cc1</chem>             | 9600  |
| 266              | CHEMBL2431940 | <chem>Cc1ccc(S(=O)(=O)N(CC(=O)N(Cc2ccc(C3CCCCC3)cc2)c2ccc(C(=O)O)c(O)c2)Cc2c(F)c(F)cc(F)c2F)cc1</chem>              | 22800 |
| 267              | CHEMBL2431929 | <chem>N#Cc1cccc1CN(CC(=O)N(Cc1ccc(C2CCCC2)cc1)c1ccc(C(=O)O)c(O)c1)S(=O)(=O)c1c(F)c(F)c(F)c(F)c1F</chem>             | 11400 |
| 268              | CHEMBL2431980 | <chem>Cc1ccc(S(=O)(=O)N(CC(=O)N(Cc2ccc(C3CCCCC3)cc2)c2ccc(C(=O)O)c(O)c2)Cc2ccc(C#N)cc2)cc1</chem>                   | 8600  |
| 269              | CHEMBL2431973 | <chem>Cc1ccc(S(=O)(=O)N(CC(=O)N(Cc2ccc(C3CCCCC3)cc2)c2ccc(C(=O)O)c(O)c2)Cc2ccccc(N)c2)cc1</chem>                    | 12400 |
| 270              | CHEMBL2431962 | <chem>Cc1ccc(S(=O)(=O)N(CC(=O)N(Cc2ccc(C3CCCCC3)cc2)c2ccc(C(=O)O)c(O)c2)Cc2ccc(F)cc2)cc1</chem>                     | 7600  |
| 271 <sup>a</sup> | CHEMBL2431960 | <chem>Cc1ccc(S(=O)(=O)N(CC(=O)N(Cc2ccc(C3CCCCC3)cc2)c2ccc(C(=O)O)c(O)c2)Cc2ccccc2F)cc1</chem>                       | 10600 |
| 272              | CHEMBL477936  | <chem>Cc1ccc(S(=O)(=O)OCC(=O)Nc2ccc(C(=O)O)c(O)c2)cc1</chem>                                                        | 84000 |

|                  |               |                                                                                                             |         |
|------------------|---------------|-------------------------------------------------------------------------------------------------------------|---------|
| 273              | CHEMBL2431930 | <chem>N#Cc1cccc(CN(CC(=O)N(Cc2ccc(C3CCCCC3)cc2)c2ccc(C(=O)O)c(O)c2)S(=O)(=O)c2c(F)c(F)c(F)c(F)c2F)c1</chem> | 19800   |
| 274              | CHEMBL3126485 | <chem>CN(C)CCCN1C(=O)c2ccc3c4ccc5c6c(ccc(c7ccc(c2c37)C1=O)c64)C(=O)N(CCCN(C)C)C5=O</chem>                   | 4500    |
| 275              | CHEMBL3133482 | <chem>O=C(O)c1cc(N(Cc2ccc(Cl)cc2)C(=O)CN(Cc2ccccc2)S(=O)(=O)c2ccc(-c3ccccc3)cc2)ccc1O</chem>                | 15000   |
| 276              | CHEMBL3133484 | <chem>O=C(O)c1cc(N(Cc2ccc(C3CCCCC3)cc2)C(=O)CN(Cc2ccccc2)S(=O)(=O)c2ccc(-c3ccccc3)cc2)ccc1O</chem>          | 23300   |
| 277 <sup>a</sup> | CHEMBL3133490 | <chem>Cc1ccc(S(=O)(=O)N(C)CC(=O)N(Cc2ccc(C3CCCCC3)cc2)c2ccc(O)c(C(=O)O)c2)cc1</chem>                        | 45000   |
| 278              | CHEMBL3133491 | <chem>CN(CC(=O)N(Cc1ccc(C2CCCC2)cc1)c1ccc(O)c(C(=O)O)c1)S(=O)(=O)c1ccc(-c2ccccc2)cc1</chem>                 | 32000   |
| 279              | CHEMBL3133493 | <chem>CC(C)Cc1ccc(CN(C(=O)CN(C)S(=O)(=O)c2ccc(-c3ccc(Cl)cc3)cc2)c2ccc(O)c(C(=O)O)c2)cc1</chem>              | 20000   |
| 280              | CHEMBL3133487 | <chem>Cc1ccc(S(=O)(=O)N(C)CC(=O)N(Cc2ccccc2)c2ccc(O)c(C(=O)O)c2)cc1</chem>                                  | 1000000 |
| 281              | CHEMBL3133486 | <chem>CC(C)Cc1ccc(CN(C(=O)CN(Cc2ccccc2)S(=O)(=O)c2ccc(-c3ccccc3)cc2)c2ccc(O)c(C(=O)O)c2)cc1</chem>          | 17000   |
| 282              | CHEMBL3133494 | <chem>CN(CC(=O)N(Cc1ccc(Cl)cc1)c1ccc(O)c(C(=O)O)c1)S(=O)(=O)c1ccc(-c2ccc(Cl)cc2)cc1</chem>                  | 43000   |
| 283              | CHEMBL3133472 | <chem>CN(CC(=O)N(Cc1ccc(-c2cenc2)c1)c1ccc(O)c(C(=O)O)c1)S(=O)(=O)c1ccc(-c2ccccc2)cc1</chem>                 | 35300   |
| 284              | CHEMBL3133488 | <chem>CN(CC(=O)N(Cc1ccccc1)c1ccc(O)c(C(=O)O)c1)S(=O)(=O)c1ccc(-c2ccccc2)cc1</chem>                          | 57000   |
| 285              | CHEMBL3133468 | <chem>O=C(O)c1cc(N(Cc2ccc(C3CCNCC3)cc2)C(=O)CN(Cc2ccccc2)S(=O)(=O)c2ccc(-c3ccccc3)cc2)ccc1O</chem>          | 300000  |
| 286              | CHEMBL3133454 | <chem>COc1ccc(CN(C(=O)c2ccc(Oc3ccccc3)cc2)c2ccc(O)c(C(=O)O)c2)cc1</chem>                                    | 118100  |
| 287              | CHEMBL3133492 | <chem>CCCCCCCc1ccc(CN(C(=O)CN(C)S(=O)(=O)c2ccc(-c3ccccc3)cc2)c2ccc(O)c(C(=O)O)c2)cc1</chem>                 | 22000   |
| 288 <sup>a</sup> | CHEMBL3133483 | <chem>COc1ccc(CN(C(=O)CN(Cc2ccccc2)S(=O)(=O)c2ccc(-c3ccccc3)cc2)c2ccc(O)c(C(=O)O)c2)cc1</chem>              | 22000   |
| 289              | CHEMBL3133467 | <chem>CCCCCCCc1ccc(CN(C(=O)CN(C)S(=O)(=O)c2ccc(-c3ccc(F)cc3)cc2)c2ccc(O)c(C(=O)O)c2)cc1</chem>              | 23000   |
| 290              | CHEMBL3133459 | <chem>O=C(O)c1cc(N(Cc2ccc(C3CCCCC3)cc2)C(=O)c2ccc(Oc3ccccc3)cc2)ccc1O</chem>                                | 15000   |

|                  |               |                                                                                                     |        |
|------------------|---------------|-----------------------------------------------------------------------------------------------------|--------|
| 291              | CHEMBL3133475 | <chem>O=C(c1ccc(Oc2ccccc2)cc1)N(Cc1ccc(C2CCCCC2)cc1)c1ccc(CP(=O)(O)O)cc1</chem>                     | 28400  |
| 292              | CHEMBL3133473 | <chem>O=C(c1ccc(Oc2ccccc2)cc1)N(Cc1ccc(C2CCCCC2)cc1)c1ccc(P(=O)(O)O)cc1</chem>                      | 42000  |
| 293 <sup>a</sup> | CHEMBL3133485 | <chem>CCCCCCCc1ccc(CN(C(=O)CN(Cc2ccccc2)S(=O)(=O)c2ccc(-c3ccccc3)cc2)c2ccc(O)c(C(=O)O)c2)cc1</chem> | 19000  |
| 294              | CHEMBL3133466 | <chem>COc1ccc(CN(C(=O)CN(C)S(=O)(=O)c2ccc(-c3ccc(Cl)cc3)cc2)c2ccc(O)c(C(=O)O)c2)cc1</chem>          | 50000  |
| 295              | CHEMBL3133469 | <chem>O=C(O)c1cc(N(Cc2cccc(-c3ccccc3)c2)C(=O)CN(Cc2ccccc2)S(=O)(=O)c2ccc(-c3ccccc3)cc2)ccc1O</chem> | 33500  |
| 296              | CHEMBL3133489 | <chem>CN(CC(=O)N(Cc1ccc(Cl)cc1)c1ccc(O)c(C(=O)O)c1)S(=O)(=O)c1ccc(-c2ccccc2)cc1</chem>              | 61000  |
| 297              | CHEMBL3133460 | <chem>CCCCCCCc1ccc(CN(C(=O)c2ccccc2)c2ccc(O)c(C(=O)O)c2)cc1</chem>                                  | 32000  |
| 298              | CHEMBL3133458 | <chem>CCCCCCCc1ccc(CN(C(=O)c2ccc(Oc3ccccc3)cc2)c2ccc(O)c(C(=O)O)c2)cc1</chem>                       | 12800  |
| 299              | CHEMBL3133481 | <chem>Cc1ccc(S(=O)(=O)N(CC(=O)N(Cc2ccc(Cl)cc2)c2ccc(O)c(C(=O)O)c2)C2CCCCC2)cc1</chem>               | 50000  |
| 300 <sup>a</sup> | CHEMBL3133470 | <chem>O=C(O)c1cc(N(Cc2ccc(N3CCOCC3)cc2)C(=O)CN(Cc2ccccc2)S(=O)(=O)c2ccc(-c3ccccc3)cc2)ccc1O</chem>  | 94700  |
| 301 <sup>a</sup> | CHEMBL3133461 | <chem>CCCCCCCc1ccc(CN(C(=O)c2ccc(OC)c2)c2ccc(O)c(C(=O)O)c2)cc1</chem>                               | 33300  |
| 302              | CHEMBL3133456 | <chem>O=C(O)c1cc(N(Cc2ccc(Cl)cc2)C(=O)c2ccc(Oc3ccccc3)cc2)ccc1O</chem>                              | 48000  |
| 303 <sup>a</sup> | CHEMBL3133496 | <chem>O=C(O)c1cc(N(Cc2ccccc2)C(=O)CN(Cc2ccccc2)S(=O)(=O)c2ccc(-c3ccccc3)cc2)ccc1O</chem>            | 22200  |
| 304              | CHEMBL3133476 | <chem>O=C(c1ccc(Oc2ccccc2)cc1)N(Cc1ccc(C2CCCCC2)cc1)c1ccc(CP(=O)(O)O)c1</chem>                      | 18900  |
| 305              | CHEMBL3133495 | <chem>Cc1ccc(S(=O)(=O)N(CC(=O)N(Cc2ccccc2)c2ccc(O)c(C(=O)O)c2)C2CCCCC2)cc1</chem>                   | 201300 |
| 306              | CHEMBL3133457 | <chem>O=C(O)c1cc(N(Cc2ccc(Br)cc2)C(=O)c2ccc(Oc3ccccc3)cc2)ccc1O</chem>                              | 52000  |
| 307              | CHEMBL1241908 | <chem>O=C(N/N=C/c1ccc2ccccc2c1=O)c1cccnc1</chem>                                                    | 180000 |
| 308              | CHEMBL3218348 | <chem>O=C(Nc1nonc1-c1ccc(Cl)cc1)c1ccc(C(F)(F)F)cc1</chem>                                           | 17700  |
| 309              | CHEMBL3600746 | <chem>COc1ccc(S(=O)(=O)Nc2ccccc2-c2ccc(C#N)cc2)cc1</chem>                                           | 440    |
| 310              | CHEMBL3600853 | <chem>COc1ccc(S(=O)(=O)N(C(C)=O)c2ccccc2-c2ccc(C#N)cc2)cc1</chem>                                   | 320    |
| 311              | CHEMBL3600755 | <chem>COc1ccc(S(=O)(=O)Nc2ccccc2-c2ccc(F)c(F)c2)cc1</chem>                                          | 2750   |
| 312 <sup>a</sup> | CHEMBL3600757 | <chem>COc1ccc(S(=O)(=O)Nc2ccccc2-c2ccc(C#N)c(F)c2)cc1</chem>                                        | 200    |

|                        |               |                                                                        |       |
|------------------------|---------------|------------------------------------------------------------------------|-------|
| <b>313</b>             | CHEMBL3600744 | <chem>COc1ccc(S(=O)(=O)Nc2ccccc2-c2ccc(F)cc2)cc1</chem>                | 4020  |
| <b>314</b>             | CHEMBL3628691 | <chem>COc1cc(CNc2nn[nH]n2)cc(Cl)c1OCc1ccc([N+](=O)[O-])cc1</chem>      | 25700 |
| <b>315<sup>a</sup></b> | CHEMBL4227152 | <chem>C=C(C)C(=O)N(Cc1ccc(Br)cc1)C(=O)/C=C/c1cc(OC)c(OC)c(OC)c1</chem> | 10000 |
| <b>316</b>             | CHEMBL465843  | <chem>COc1cc(/C=C/C(=O)N2CCC=CC2=O)cc(OC)c1OC</chem>                   | 7000  |

**Table S2:** STAT3 complexes in Protein Data Bank (PDB).

| Protein Data bank code <sup>a</sup> | Resolution (Å) | Molecular weight of Co-crystallized ligand | Ligand affinity Ki (nM) | Description                                                                  | Reference |
|-------------------------------------|----------------|--------------------------------------------|-------------------------|------------------------------------------------------------------------------|-----------|
| 4ZIA                                | 2.7            | not found                                  | not found               | Crystal Structure of STAT3 N-terminal domain                                 | 31        |
| 3CWG                                | 3.05           | not found                                  | not found               | Unphosphorylated mouse STAT3 core fragment                                   | 32        |
| 6QHD                                | 2.85           | not found                                  | not found               | Lysine acetylated and tyrosine phosphorylated STAT3 in a complex with DNA    | 33        |
| 4E68                                | 2.59           | not found                                  | not found               | Unphosphorylated STAT3B core protein binding to dsDNA                        | 34        |
| 5U5S                                | Solution NMR   | 188.22 N(6)-Acetyl lysine                  | not found               | Solution structures of Brd2 second bromodomain in complex with stat3 peptide | 35        |
| 6NJS                                | 2.7            | 835.79 KQV                                 | 14 nM                   | Stat3 Core in complex with compound SD36                                     | 36        |
| 6NUQ                                | 3.15           | 835.79 KQV                                 | 14 nM                   | Stat3 Core in complex with compound SI109                                    | 36        |
| 1BG1                                | 2.25           | not found                                  | not found               | Transcription Factor Stat3b/DNA Complex                                      | 37        |
| 6TLC                                | 2.9            | not found                                  | not found               | Unphosphorylated human STAT3 in complex with MS3-6 monobody                  | 38        |

<sup>a</sup>Searching the PDB database for STAT3 complexes identified 32 protein structures, out of which only 9 are STAT3 protein structures (listed in the table above), the rest are STAT3-related cellular signaling proteins and were therefore neglected. Two of the nine STAT3 structures are short fragments and unsuitable for docking purposes (namely, 4ZIA and 5U5S, respectively).

**Table S3:** Cross correlation ( $R^2$ ) matrix of the 9 docking- scoring functions used in this experiment <sup>a,b</sup>.

|                            | LigScore 1 | LigScore 2 | PLP1 | PLP2 | Jain | PMF  | PMF04 | Cdocker energy | Cdocker interaction energy |
|----------------------------|------------|------------|------|------|------|------|-------|----------------|----------------------------|
| LigScore 1                 | 1.00       |            |      |      |      |      |       |                |                            |
| LigScore 2                 | 0.53       | 1.00       |      |      |      |      |       |                |                            |
| PLP1                       | 0.28       | 0.71       | 1.00 |      |      |      |       |                |                            |
| PLP2                       | 0.27       | 0.70       | 0.97 | 1.00 |      |      |       |                |                            |
| Jain                       | 0.17       | 0.52       | 0.80 | 0.84 | 1.00 |      |       |                |                            |
| PMF                        | 0.19       | 0.50       | 0.60 | 0.59 | 0.47 | 1.00 |       |                |                            |
| PMF04                      | 0.16       | 0.49       | 0.57 | 0.57 | 0.44 | 0.86 | 1.00  |                |                            |
| Cdocker energy             | 0.00       | 0.00       | 0.00 | 0.00 | 0.00 | 0.00 | 0.00  | 1.00           |                            |
| Cdocker interaction energy | 0.05       | 0.28       | 0.42 | 0.45 | 0.48 | 0.24 | 0.24  | 0.00           | 1.00                       |

<sup>a</sup> A value of 0 implies that there is no linear dependency between the two variables. While a value of 1 indicates the existence of a perfect linear equation connecting the corresponding scoring functions pair.

<sup>b</sup> Cross correlation equation value exceeding 0.9 implies significant linearity between the two variables.

**Table S4:** Independent samples T-test statistical analysis and related statistical criteria for evaluating the difference between highly potent compounds ( $IC_{50} < 1.0 \mu M$ ) and less potent compounds ( $IC_{50} \geq 1.0 \mu M$ ) within the “active” category in SHAP selected descriptors used for building Hypo-1 and Hypo-2.

| SHAP descriptors                  | Group Statistical criteria <sup>a</sup> |                  |                        | t-test for equality of means ( $\alpha = 0.05$ ) |                    |
|-----------------------------------|-----------------------------------------|------------------|------------------------|--------------------------------------------------|--------------------|
|                                   | Group <sup>b,c</sup>                    | Observations (N) | Mean                   | Standard deviation                               | p-value (2-tailed) |
| <b>PLP2</b>                       | $IC_{50} \geq 1.0 \mu M$                | 4045             | 93.84                  | 34.44                                            | 0.000              |
|                                   | $IC_{50} < 1.0 \mu M$                   | 5384             | 96.84                  | 35.413                                           |                    |
| <b>PMF</b>                        | $IC_{50} \geq 1.0 \mu M$                | 4045             | 75.62                  | 28.61                                            | 0.036              |
|                                   | $IC_{50} < 1.0 \mu M$                   | 5384             | 76.90                  | 30.03                                            |                    |
| <b>Cdocker Energy</b>             | $IC_{50} \geq 1.0 \mu M$                | 4045             | $-11.93 \cdot 10^{13}$ | $75.32 \cdot 10^{14}$                            | 0.318              |
|                                   | $IC_{50} < 1.0 \mu M$                   | 5384             | $-10.66 \cdot 10^{11}$ | $33.63 \cdot 10^{12}$                            |                    |
| <b>Cdocker Interaction Energy</b> | $IC_{50} \geq 1.0 \mu M$                | 4045             | -65.16                 | 145.25                                           | 0.031              |
|                                   | $IC_{50} < 1.0 \mu M$                   | 5384             | -58.53                 | 148.96                                           |                    |
| <b>SER 613 HN</b>                 | $IC_{50} \geq 1.0 \mu M$                | 4045             | 0.28                   | 0.45                                             | 0.602              |
|                                   | $IC_{50} < 1.0 \mu M$                   | 5384             | 0.28                   | 0.45                                             |                    |

<sup>a</sup>Docked poses of all active compounds (training and testing) were considered for the analysis

<sup>b</sup>Docked poses corresponding to active docked compounds with  $IC_{50} \geq 1.0 \mu M$ .

<sup>c</sup>Docked poses corresponding to active docked compounds with  $IC_{50} < 1.0 \mu M$ .

**Table S5:** Forward and reverse primer sequences for STAT3 target genes analyzed in q-PCR

| Gene   | Forward primer        | Reverse primer       |
|--------|-----------------------|----------------------|
| c-myc  | GGATTCTCTGCTCTCCTCGAC | CTTCTTGTTCCCTCAGAGTC |
| Bcl-XL | CCAGGGTCTTCCCTACCTCA  | GACTGGCCCTTCTAGTCAGC |

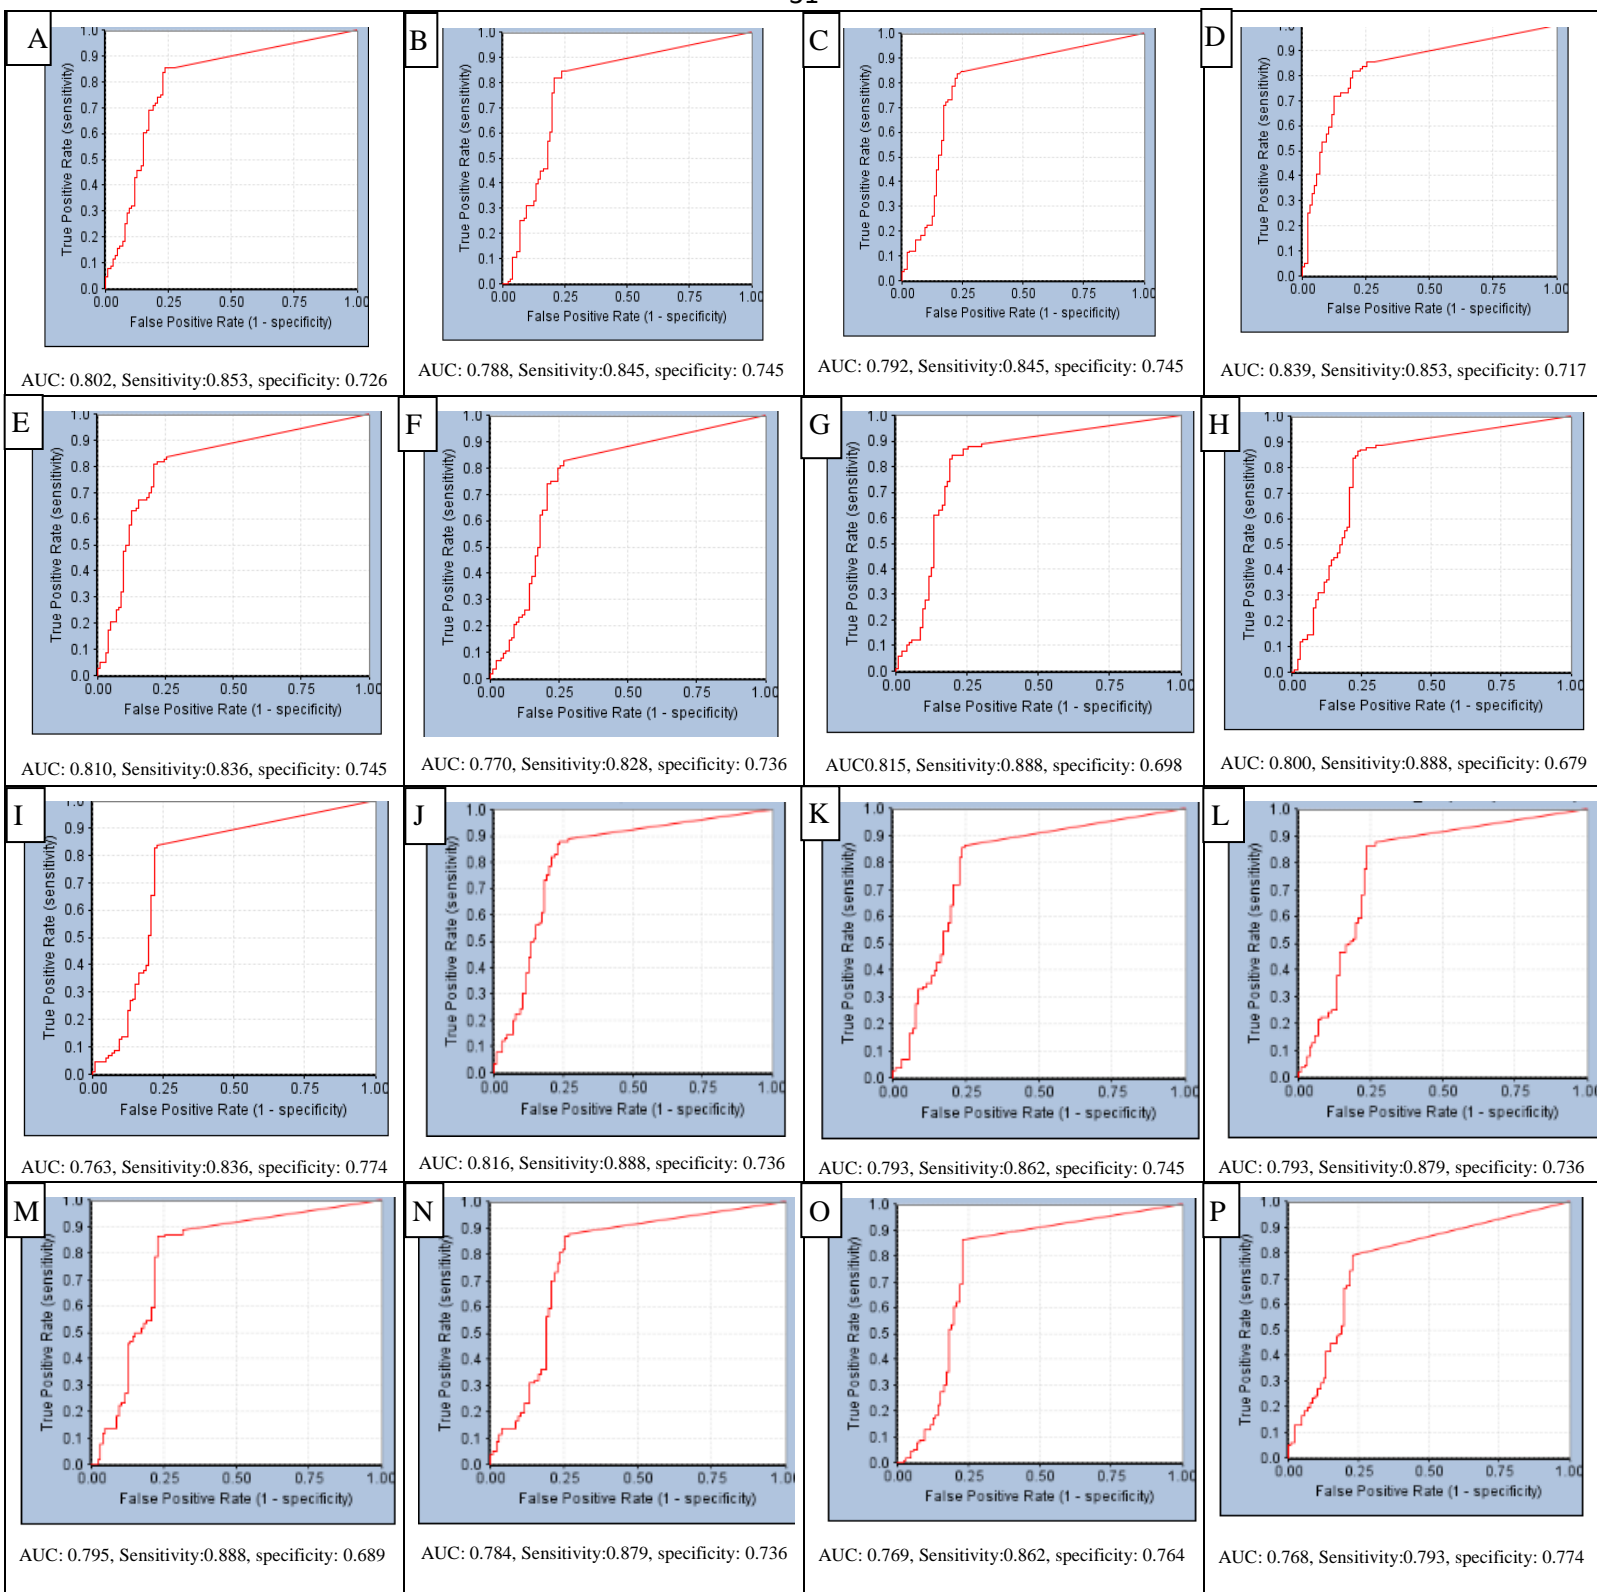

**Figure S1:** ROC curves of pharmacophores generated from crystallographic complexes  $\delta njs$  and  $\delta nuq$  : **A.** Hypo( $\delta njs$ -04), **B.** Hypo( $\delta njs$ -05), **C.** Hypo( $\delta njs$ -06), **D.** Hypo( $\delta njs$ -08), **E.** Hypo( $\delta njs$ -09), **F.** Hypo( $\delta njs$ -10), **G.** Hypo( $\delta nuq$ -01), **H.** Hypo( $\delta nuq$ -02), **I.** Hypo( $\delta nuq$ -03), **J.** Hypo( $\delta nuq$ -04), **K.** Hypo( $\delta nuq$ -05), **L.** Hypo( $\delta nuq$ -06), **M.** Hypo( $\delta nuq$ -07), **N.** Hypo( $\delta nuq$ -08), **O.** Hypo( $\delta nuq$ -09), **P.** Hypo( $\delta nuq$ -10).

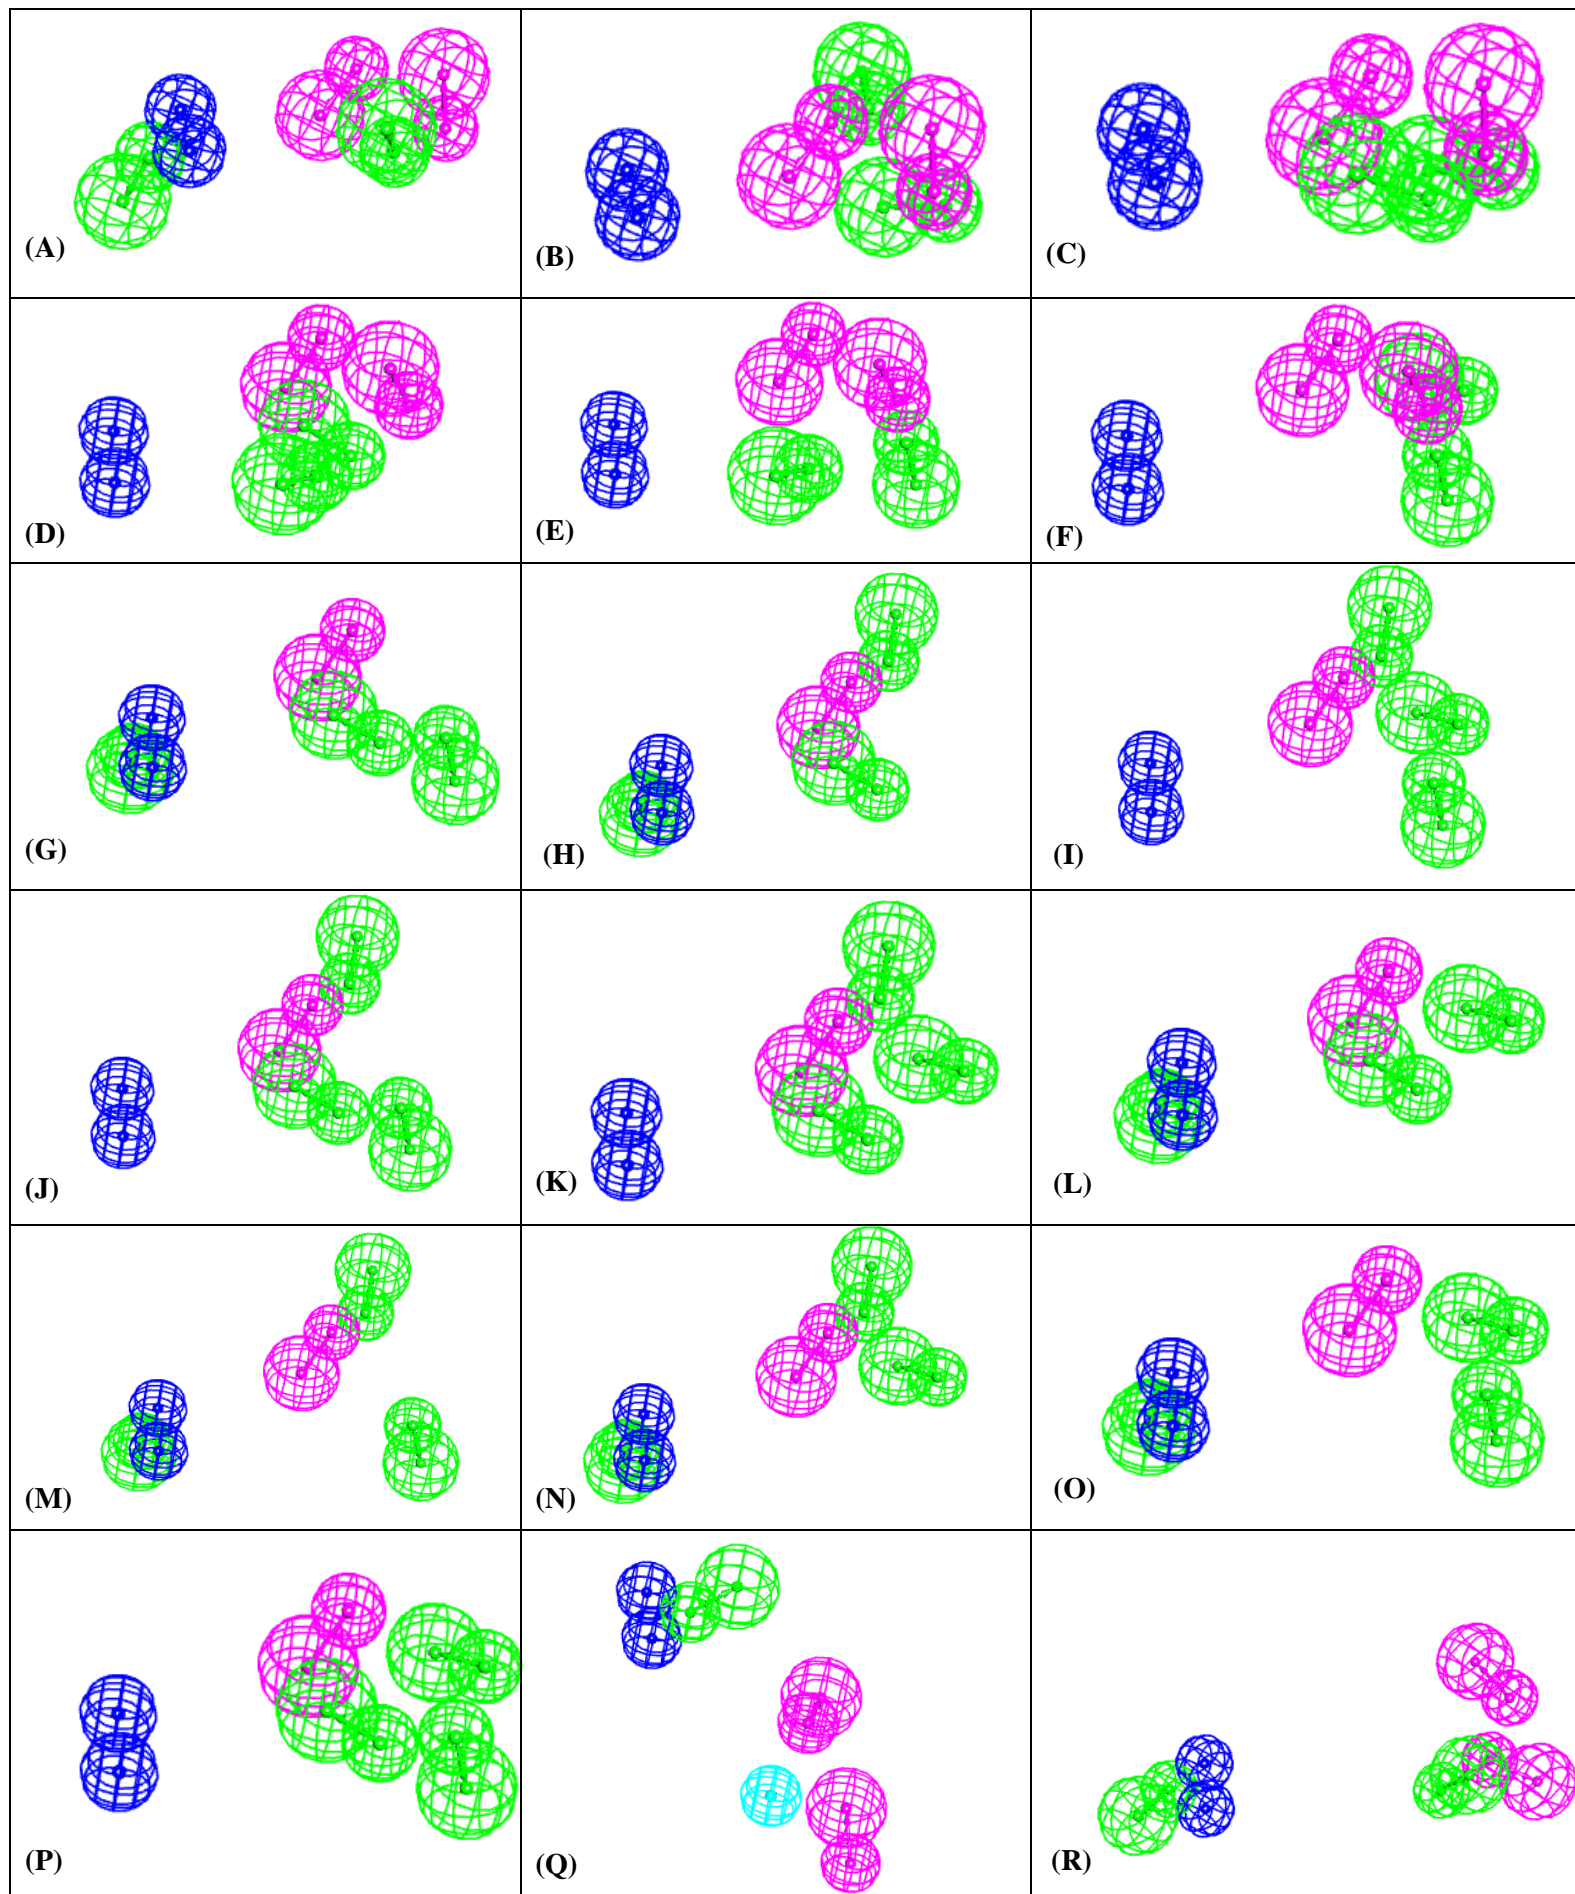

**Figure S2:** Pharmacophores generated from crystallographic complexes 6njs and 6nuq. (A) Hypo(6njs-04), (B) Hypo(6njs-05), (C) Hypo(6njs-06), (D) Hypo(6njs-08), (E) Hypo(6njs-09), (F) Hypo(6njs-10), (G) Hypo(6nuq-01), (H) Hypo(6nuq-02), (I) Hypo(6nuq-03), (J) Hypo(6nuq-04), (K) Hypo(6nuq-05), (L) Hypo(6nuq-06), (M) Hypo(6nuq-07), (N) Hypo(6nuq-08), (O) Hypo(6nuq-09), (P) Hypo(6nuq-10), (Q) Hypo-1 and (R) Hypo-2.



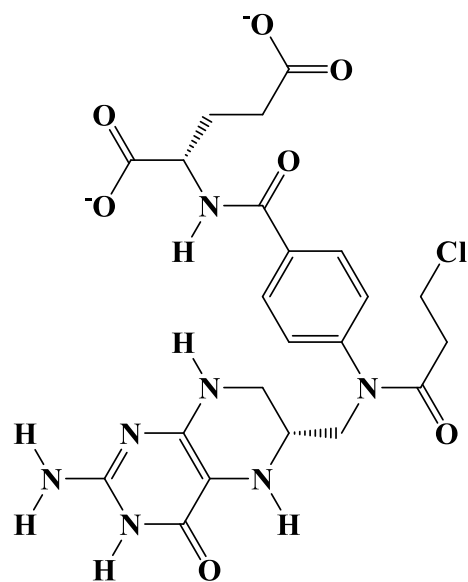

**317** (NCI code: 3590)

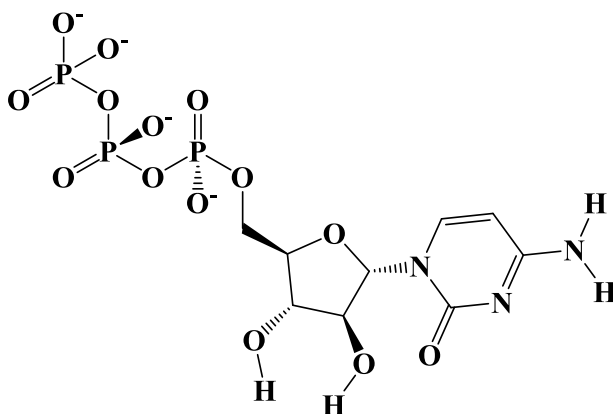

**318** (NCI code: 20261)

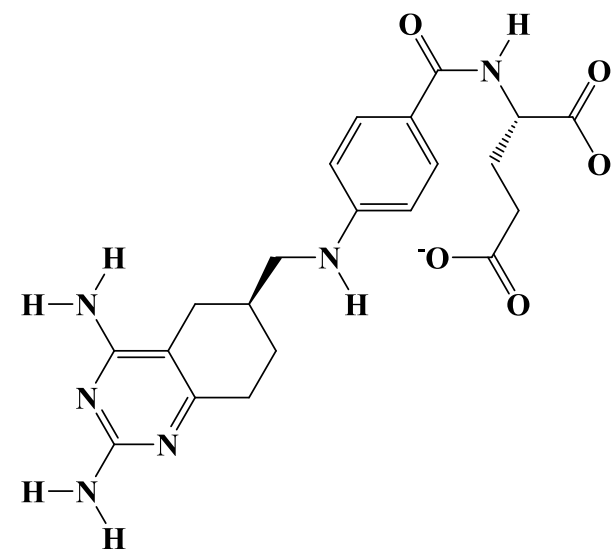

**319** (NCI code: 59407)

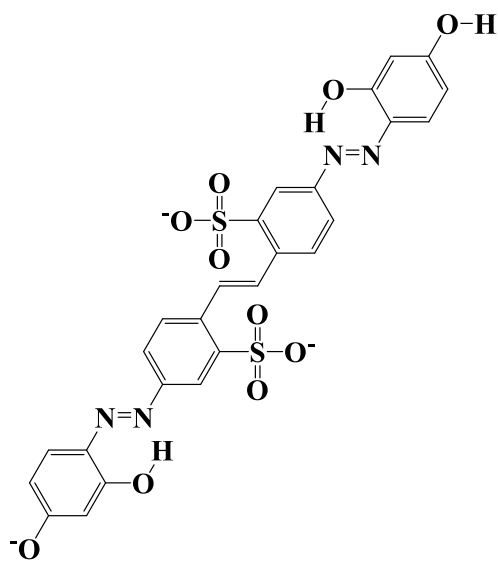

**320** (NCI code: 65832)

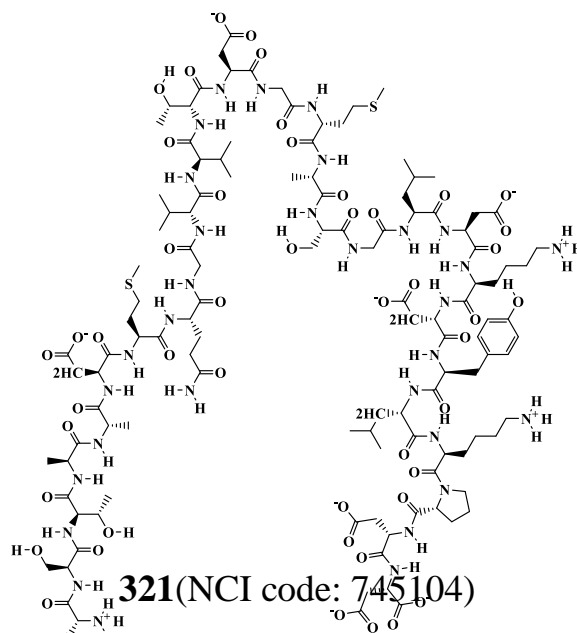

**321** (NCI code: 745104)

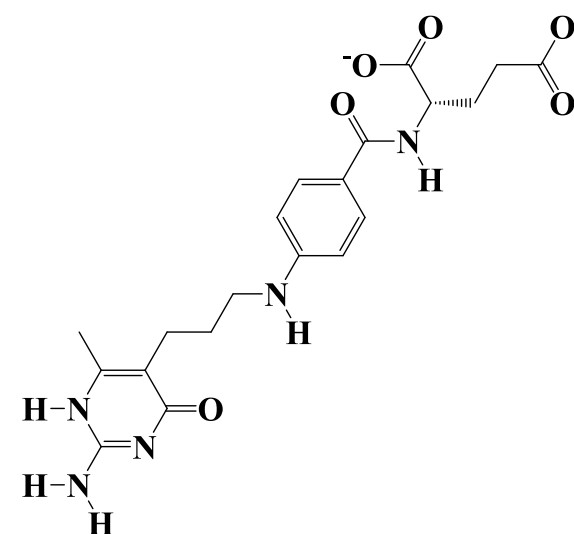

**322** (NCI code: 72868)

**Figure S3.** Chemical structures of high-ranking captured hits

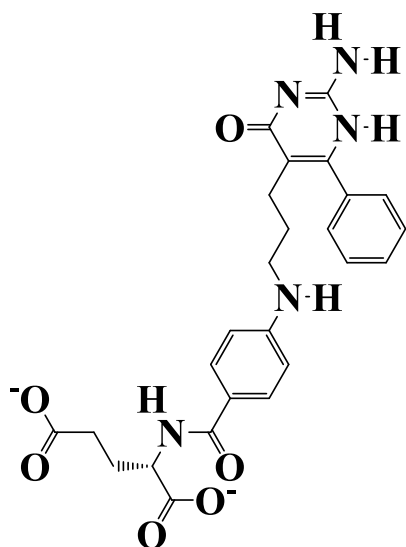

323 (NCI code: 77028)

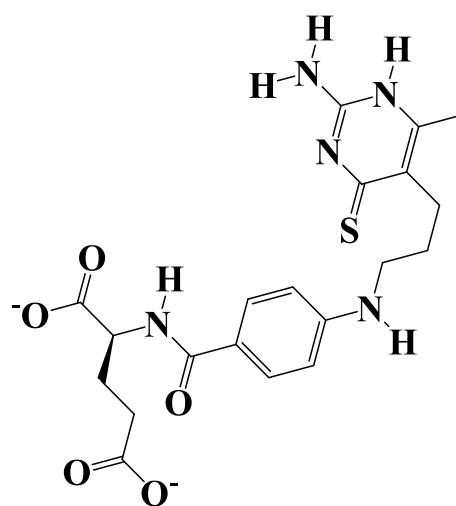

324 (NCI code: 77029)

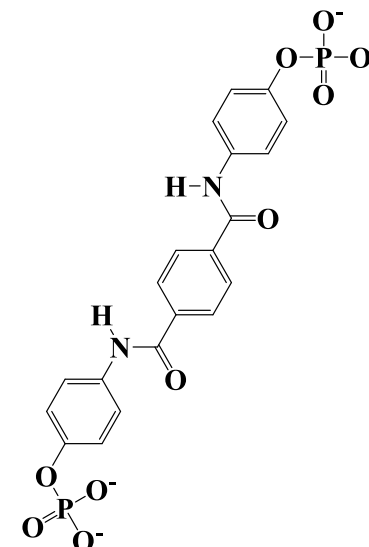

325 (NCI code: 82523)

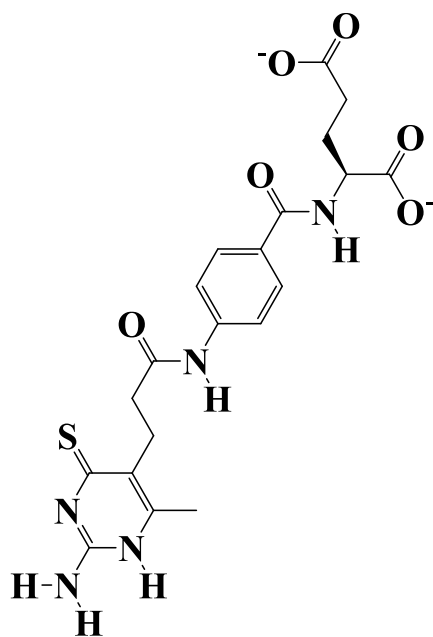

326 (NCI code: 98711)

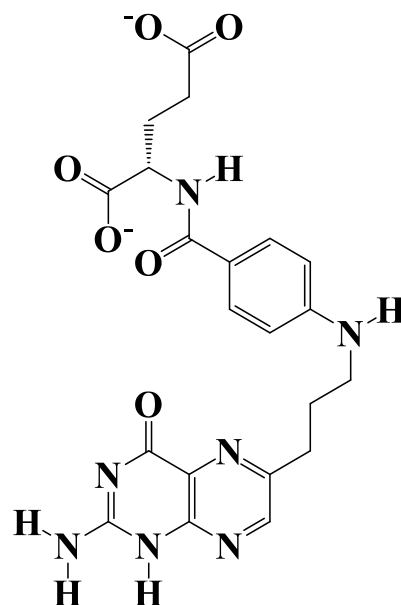

327 (NCI code: 100791)

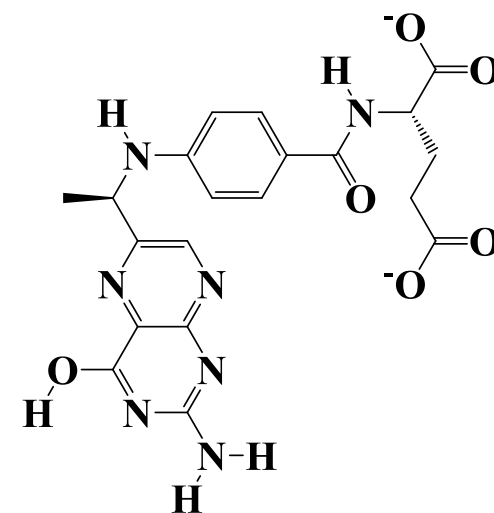

328 (NCI code: 107137)

Figure S3. Chemical structures of high-ranking captured hits

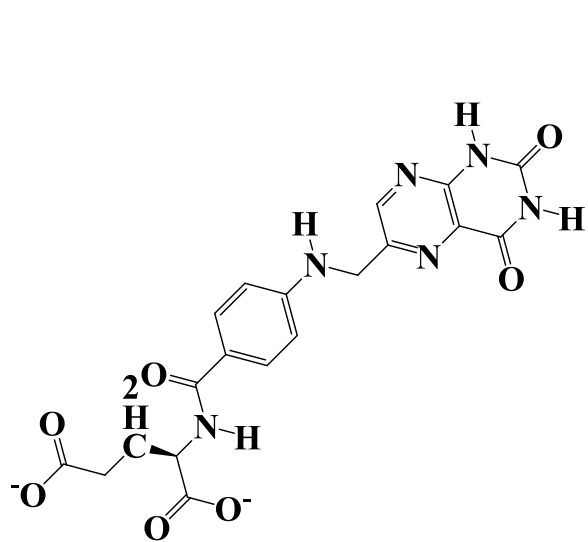

**329** (NCI code: 107139)

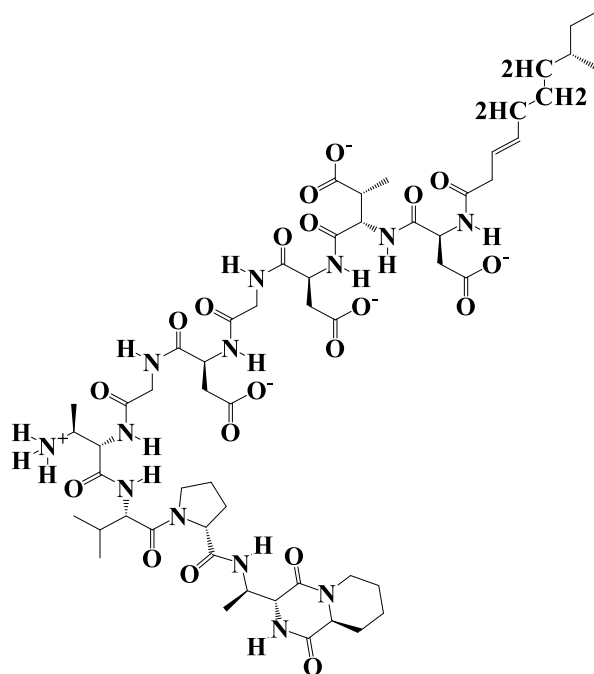

**330** (NCI code: 267431)

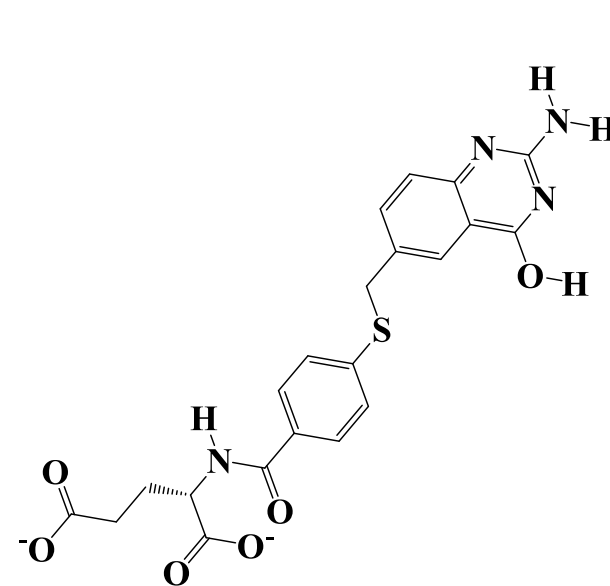

**331** (NCI code: 289523)

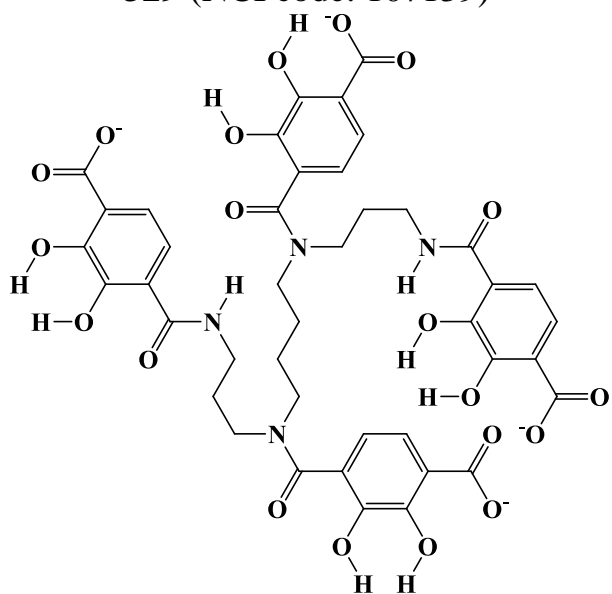

**332** (NCI code: 338310)

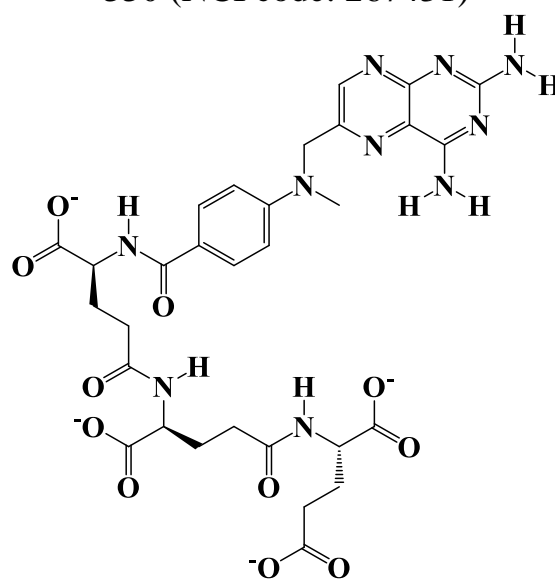

**333** (NCI code: 341076)

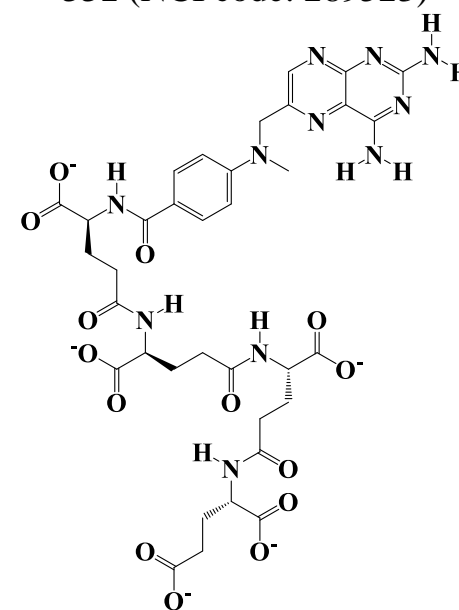

**334** (NCI code: 341077)

**Figure S3.** Chemical structures of high-ranking captured hits

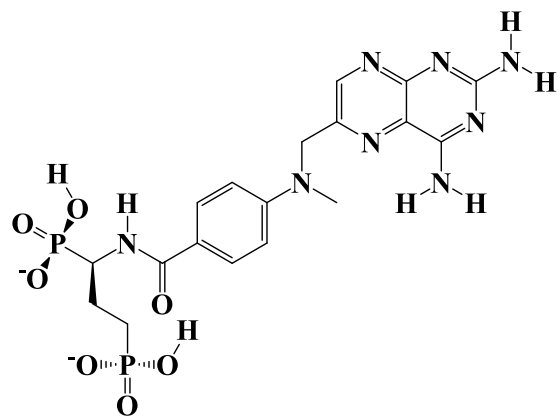

335 (NCI code: 363007)

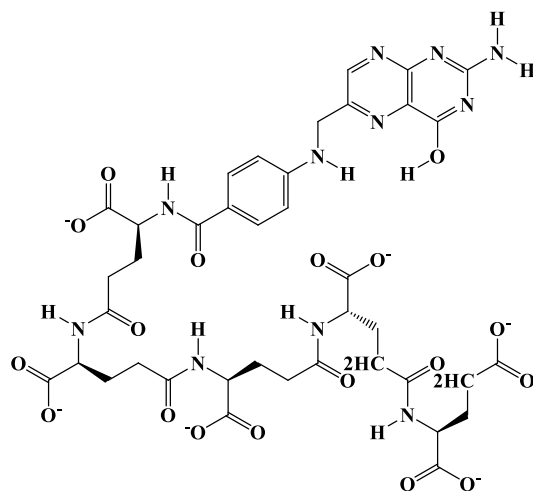

336 (NCI code: 372667)

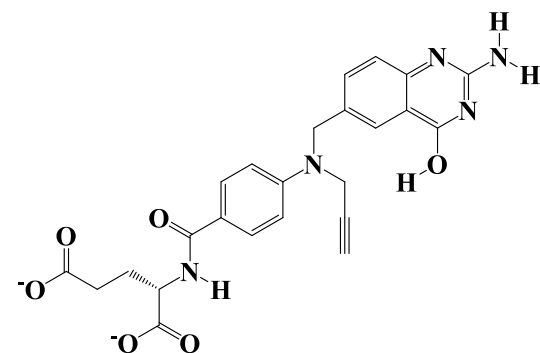

337 (NCI code: 373233)

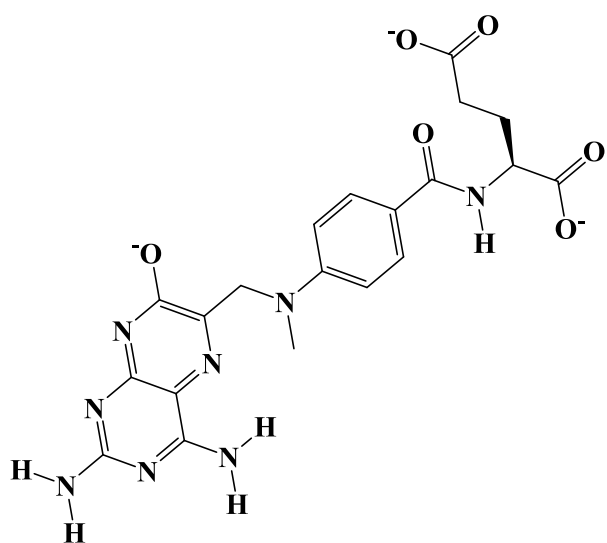

338 (NCI code: 380962)

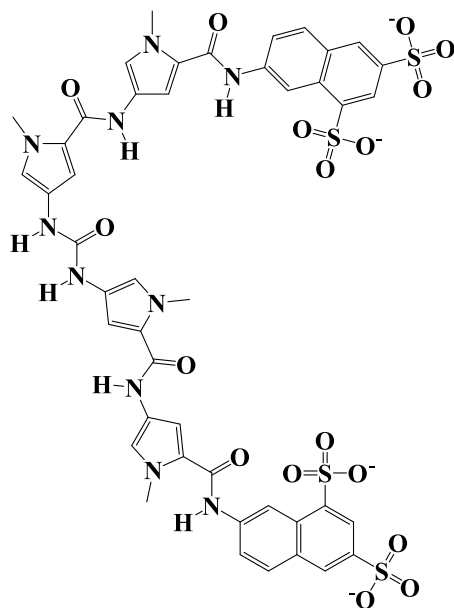

339 (NCI code: 645793)

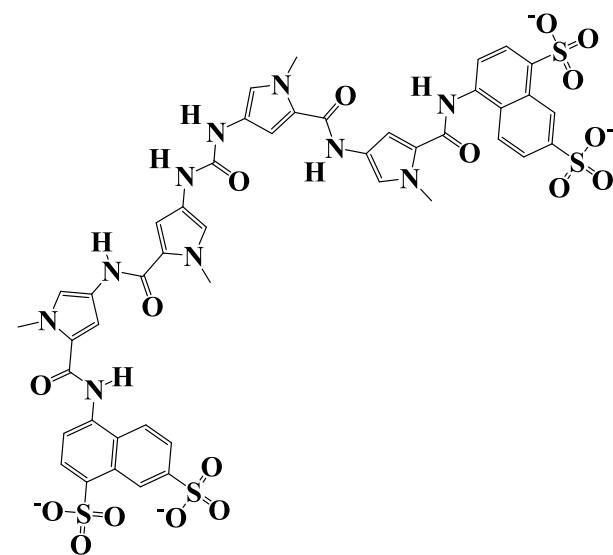

340 (NCI code: 651016)

Figure S3. Chemical structures of high-ranking captured hits

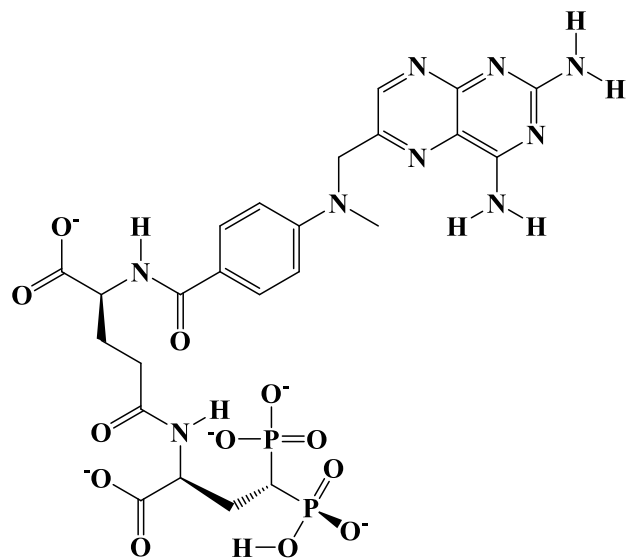

**341** (NCI code: 669269)

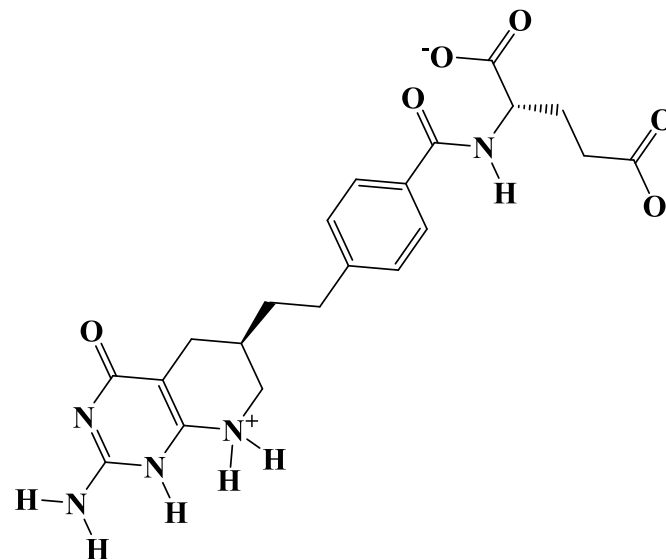

**342** (NCI code: 722969)

**Figure S3.** Chemical structures of high-ranking captured hits
